# Supplementary material for: Synthetic approach to flavanones and flavones via ligand-free palladium(ii)-catalyzed conjugate addition of arylboronic acids to chromones
Source: Royal Society of Chemistry journal article supplement (doi:10.1039/c2ob26061a), 2012-01-01

## *Supporting Information*

# **Synthetic Approach to Flavanones and Flavones via Ligand-Free Palladium(II)-Catalyzed Conjugate Addition of Arylboronic Acids to Chromones**

*Donghee Kim, Kyoungrok Ham and Sungwoo Hong\**

*Department of Chemistry, Korea Advance Institute of Science and Technology (KAIST),  
Daejeon 305-701, Korea*

|                                         |           |
|-----------------------------------------|-----------|
| <b>I. General Methods and Materials</b> | <b>S2</b> |
| <b>II. Optimization Study</b>           | <b>S2</b> |

### *Appendix I*

|                                                                                             |           |
|---------------------------------------------------------------------------------------------|-----------|
| <b>Spectral Copies of <sup>1</sup>H- and <sup>13</sup>C-NMR Data Obtained in this Study</b> | <b>S4</b> |
|---------------------------------------------------------------------------------------------|-----------|

## I. General Methods and Materials

Unless stated otherwise, reactions were performed in flame-dried glassware under a positive pressure of oxygen. Solvents were used without purification or degassing. Analytical thin layer chromatography (TLC) was performed on precoated silica gel 60 F<sup>254</sup> plates and visualization on TLC was achieved by UV light (254 and 354 nm). Flash column chromatography was undertaken on silica gel (400-630 mesh). <sup>1</sup>H NMR was recorded on 400 MHz and chemical shifts were quoted in parts per million (ppm) referenced to the appropriate solvent peak or 0.0 ppm for tetramethylsilane. The following abbreviations were used to describe peak splitting patterns when appropriate: br = broad, s = singlet, d = doublet, t = triplet, q = quartet, m = multiplet, dd = doublet of doublet, td = doublet of triplet. Coupling constants, *J*, were reported in hertz unit (Hz). <sup>13</sup>C NMR was recorded on 100 MHz and was fully decoupled by broad band proton decoupling. Chemical shifts were reported in ppm referenced to the center line of a triplet at 77.0 ppm of Chloroform-d. High-resolution mass spectrometry (HRMS) data were recorded on LC-TOF. Commercial grade reagents and solvents were used without further purification except as indicated below. Unless otherwise stated, all commercial reagents and solvents were used without additional purification.

## II. Optimization Study

**Table 1S. Screening of Oxidants**

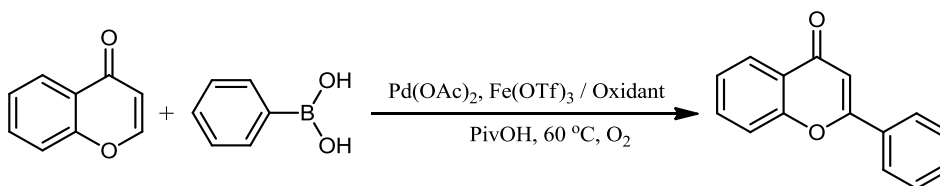

| entry | oxidant              | yield (%) |
|-------|----------------------|-----------|
| 1     | Pb(OAc) <sub>4</sub> | -         |
| 2     | MnO <sub>2</sub>     | 8         |
| 3     | CAN                  | -         |
| 4     | CrO <sub>3</sub>     | 71        |

|    |                               |       |
|----|-------------------------------|-------|
| 5  | PDC                           | -     |
| 6  | BQ                            | trace |
| 7  | Oxone <sup>®</sup>            | 55    |
| 8  | I <sub>2</sub>                | -     |
| 9  | Tl(OTf) <sub>3</sub>          | -     |
| 10 | SeO <sub>2</sub>              | -     |
| 11 | IBX                           | -     |
| 12 | <i>m</i> -CPBA                | 30    |
| 13 | (BzO) <sub>2</sub>            | 62    |
| 14 | <i>t</i> -BuOOH               | -     |
| 15 | ( <i>t</i> -BuO) <sub>2</sub> | -     |
| 16 | TEMPO                         | 20    |
| 17 | DDQ                           | 35    |
| 18 | DDQ, KNO <sub>2</sub>         | 97    |

## 2-Phenylchroman-4-one (3a)

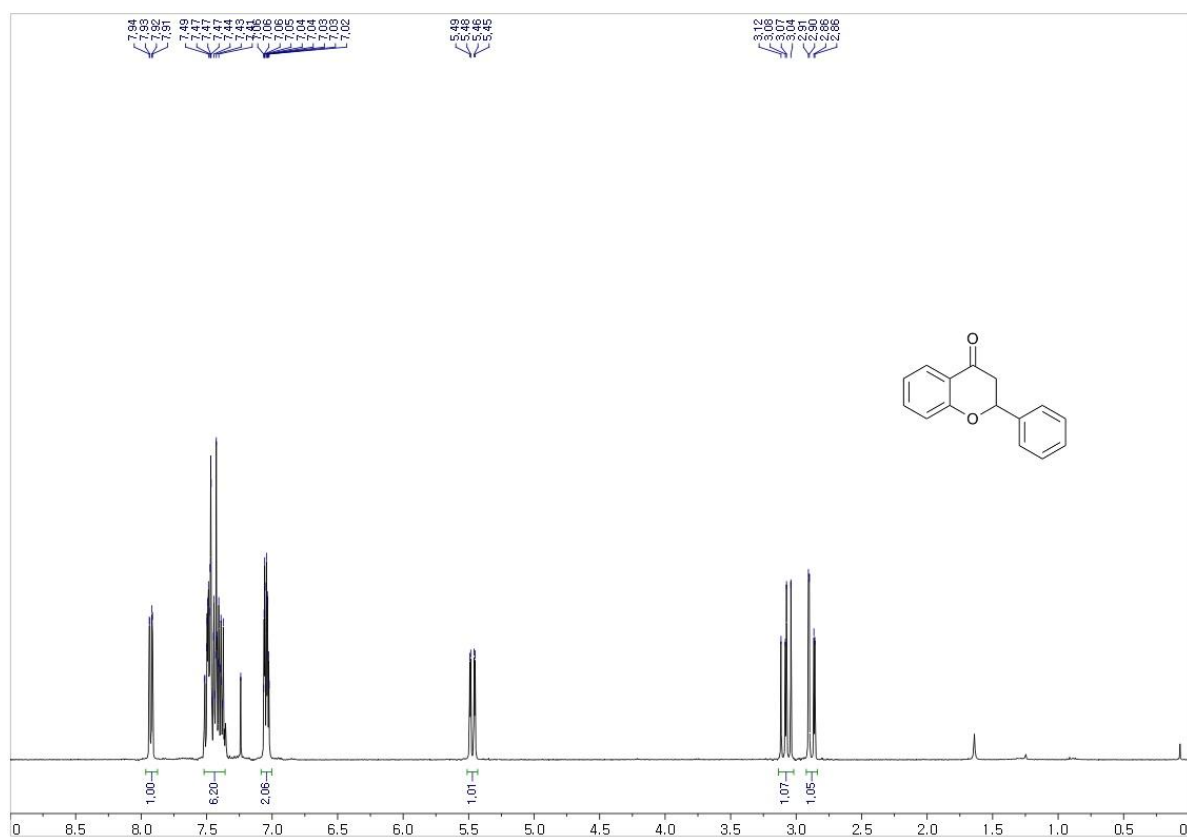

400 Mhz, <sup>1</sup>H NMR in Chloroform-d

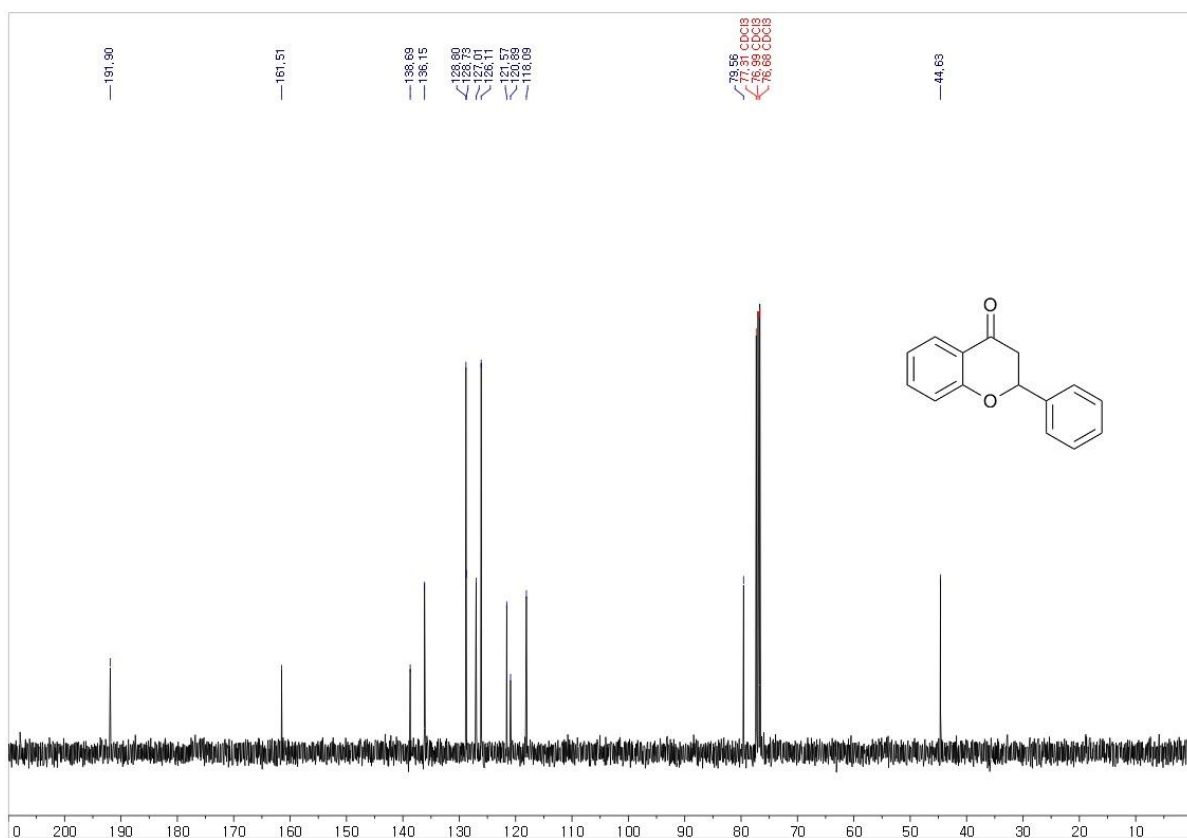

100 Mhz, <sup>13</sup>C NMR in Chloroform-d

## 2-Phenyl-4H-chromen-4-one (4a)

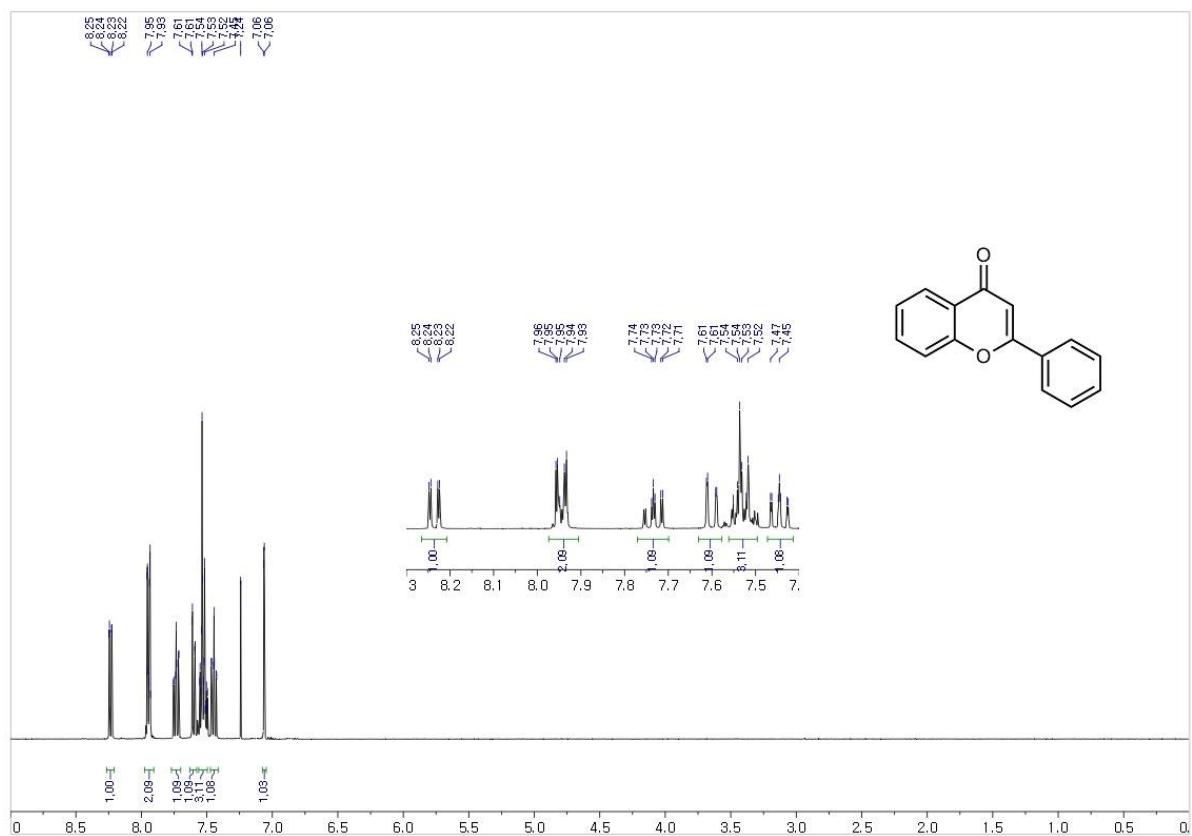

400 Mhz, <sup>1</sup>H NMR in Chloroform-d

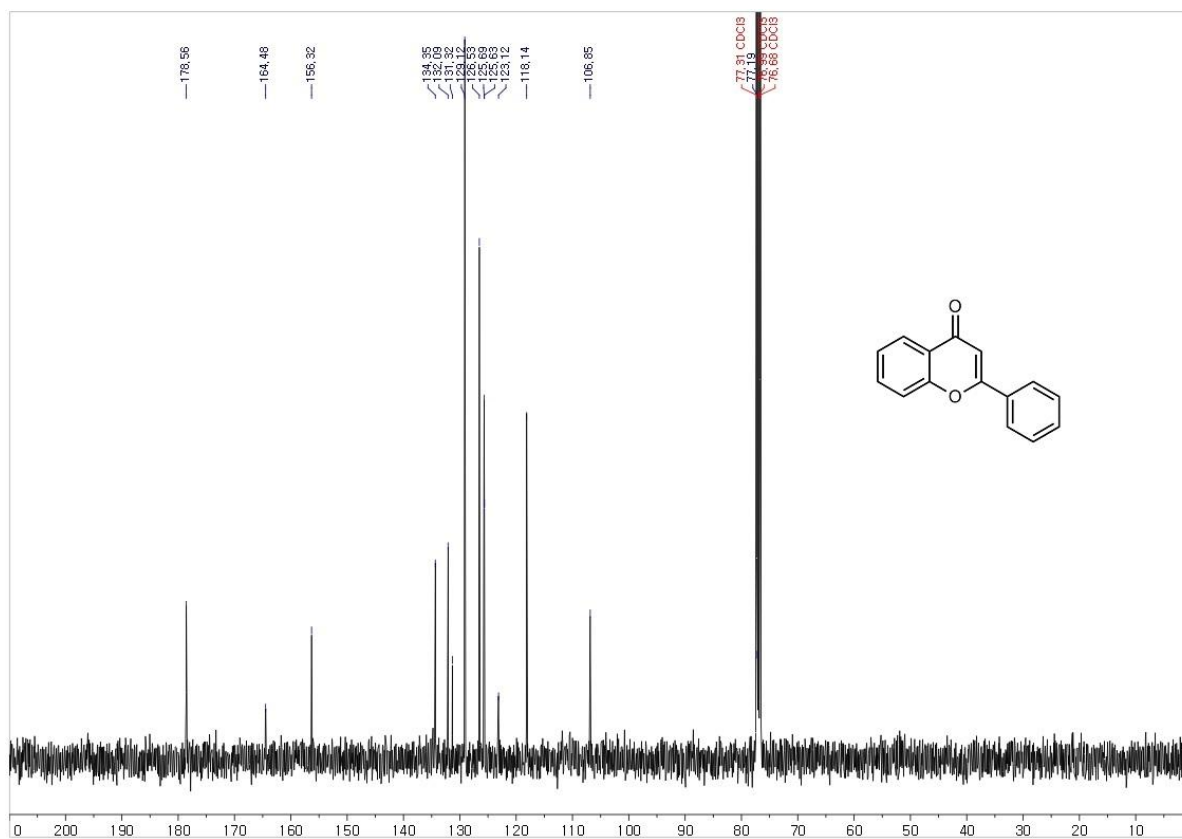

100 Mhz, <sup>13</sup>C NMR in Chloroform-d

**2-(*p*-tolyl)-4H-chromen-4-one (4b)**

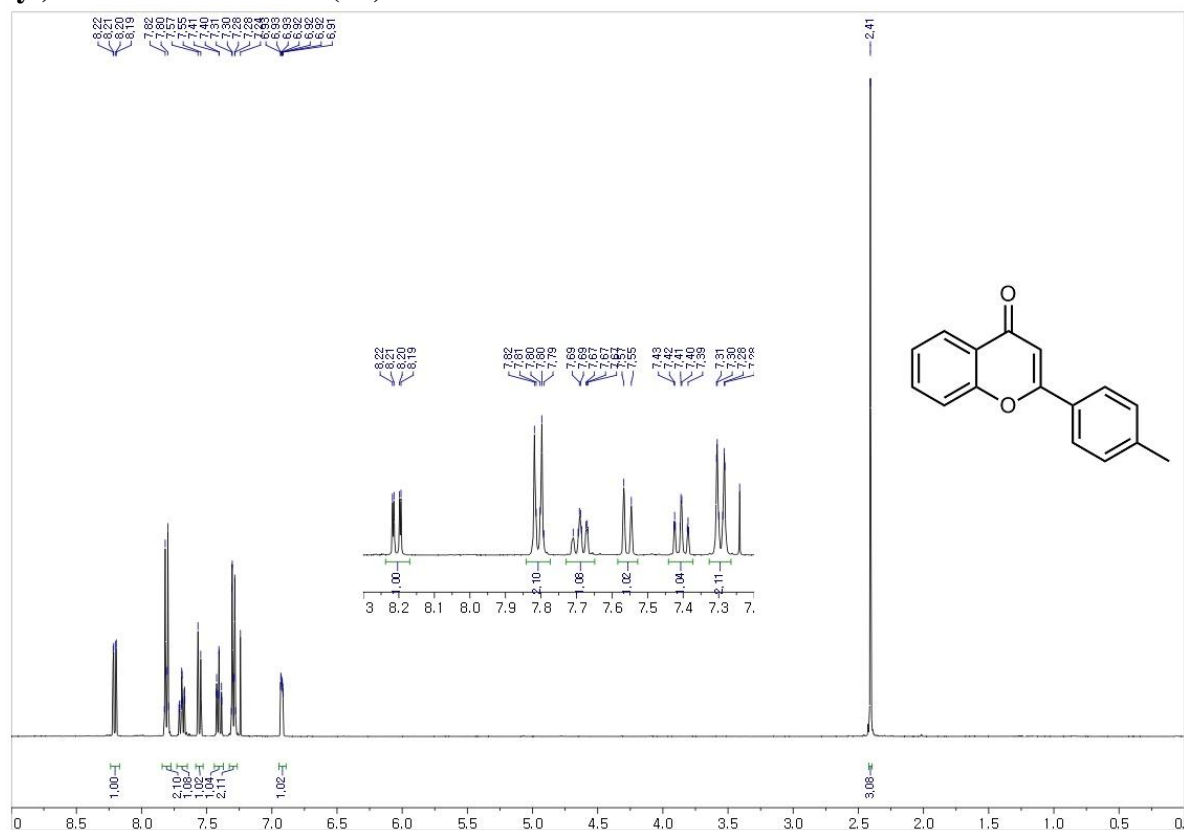

400 Mhz, <sup>1</sup>H NMR in Chloroform-d

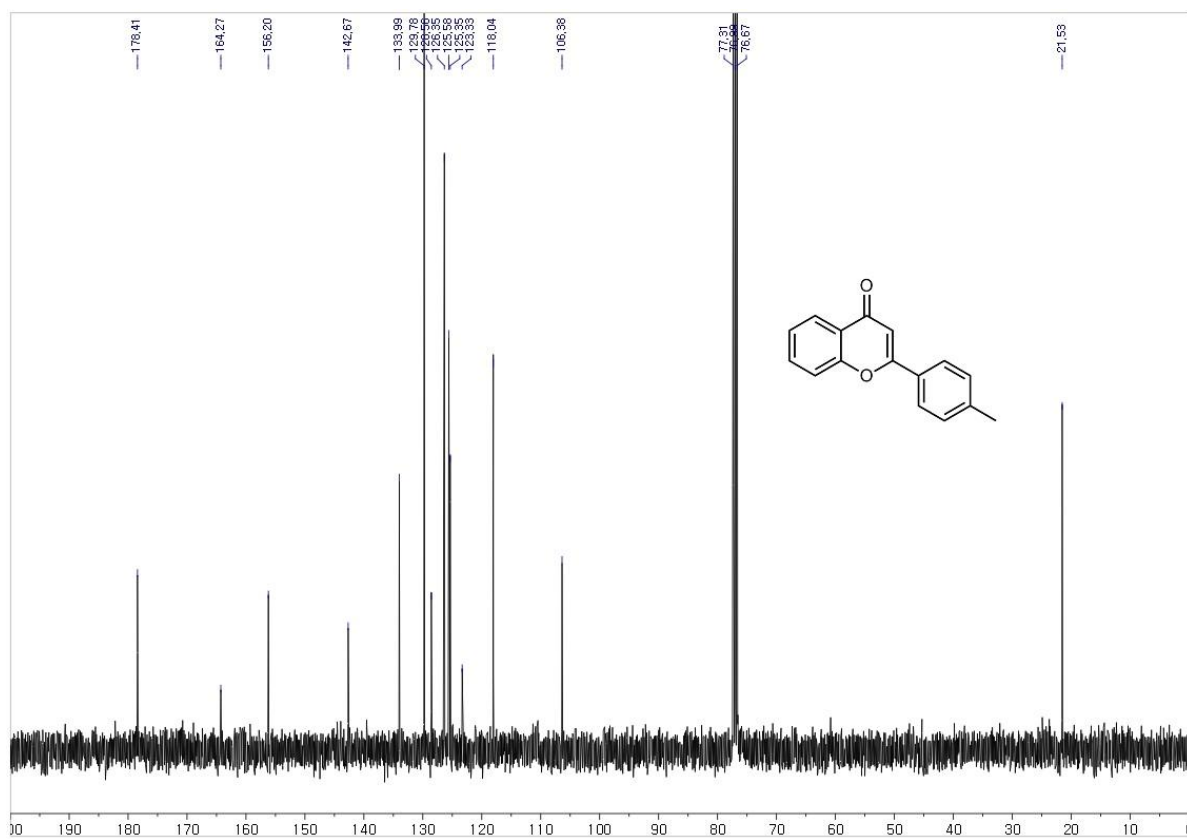

100 Mhz, <sup>13</sup>C NMR in Chloroform-d

## 2-(4-methoxyphenyl)-4H-chromen-4-one (4c)

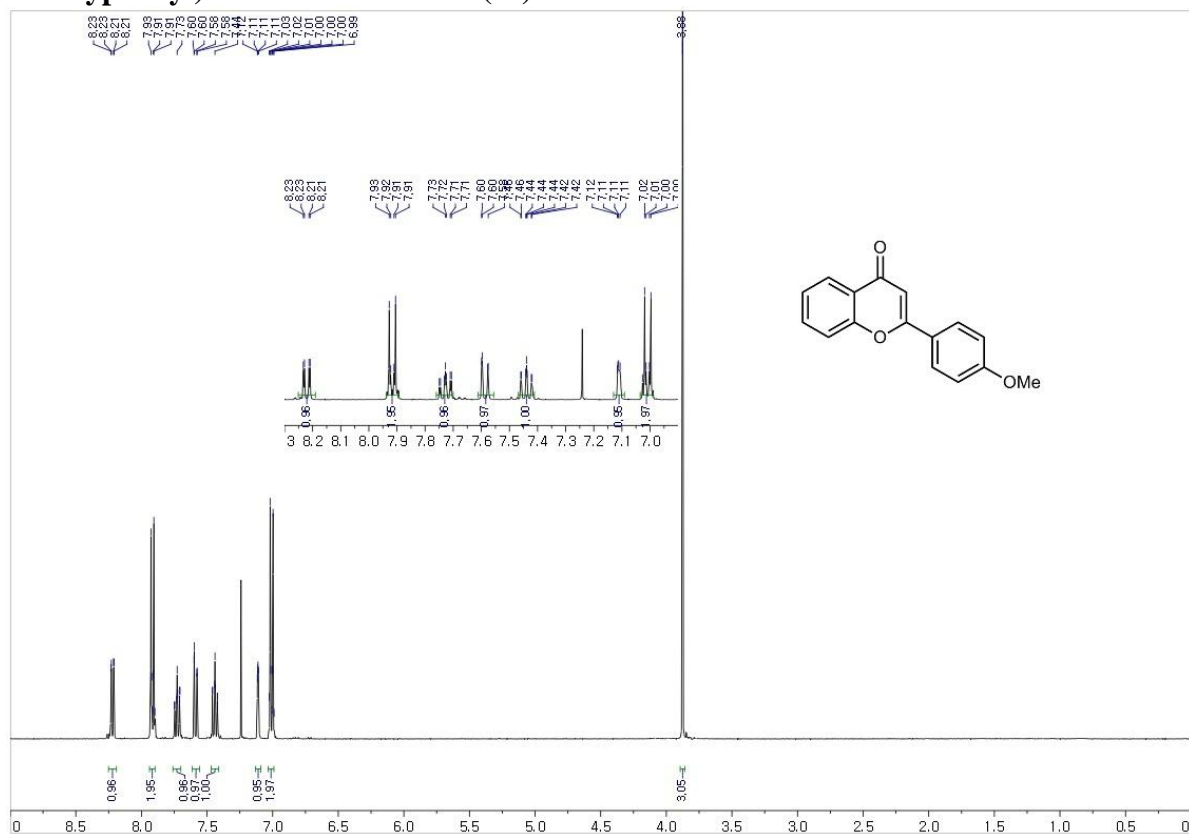

400 Mhz, <sup>1</sup>H NMR in Chloroform-d

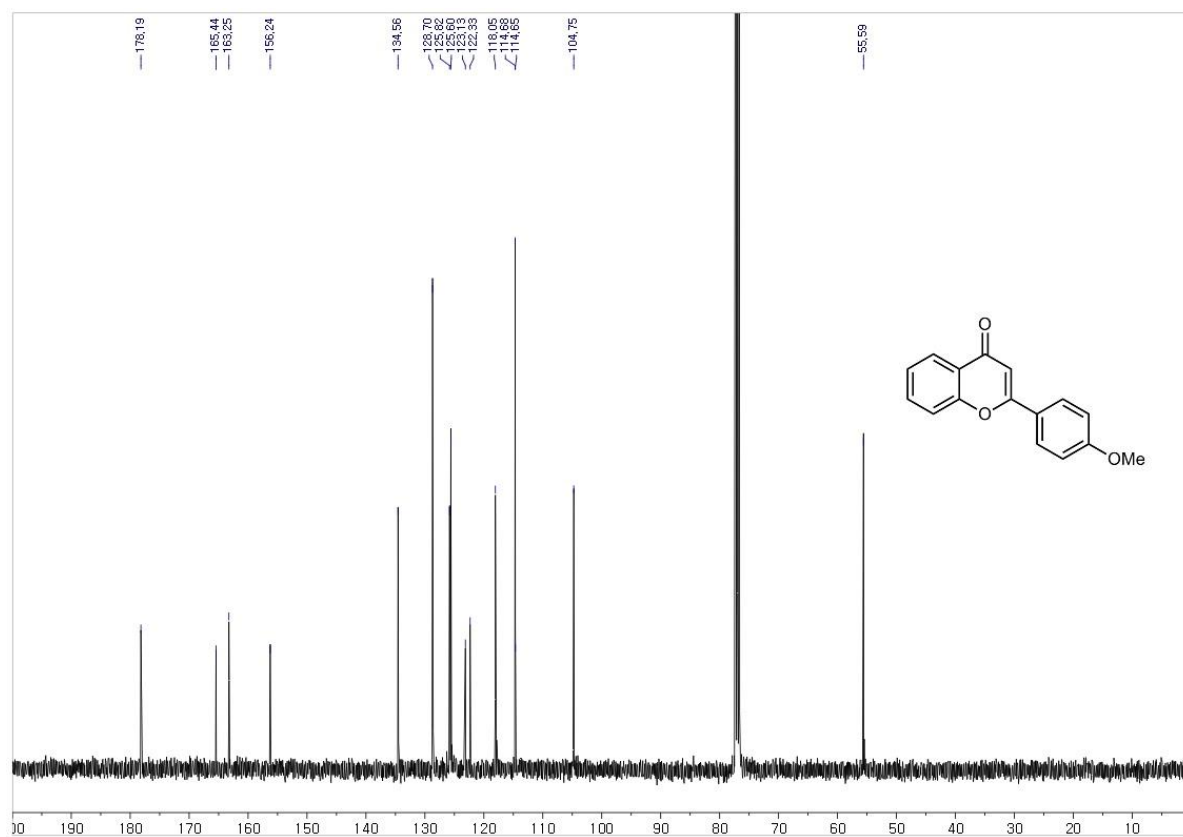

100 Mhz, <sup>13</sup>C NMR in Chloroform-d

## 2-(3,5-bis(trifluoromethyl)phenyl)-4H-chromen-4-one (4d)

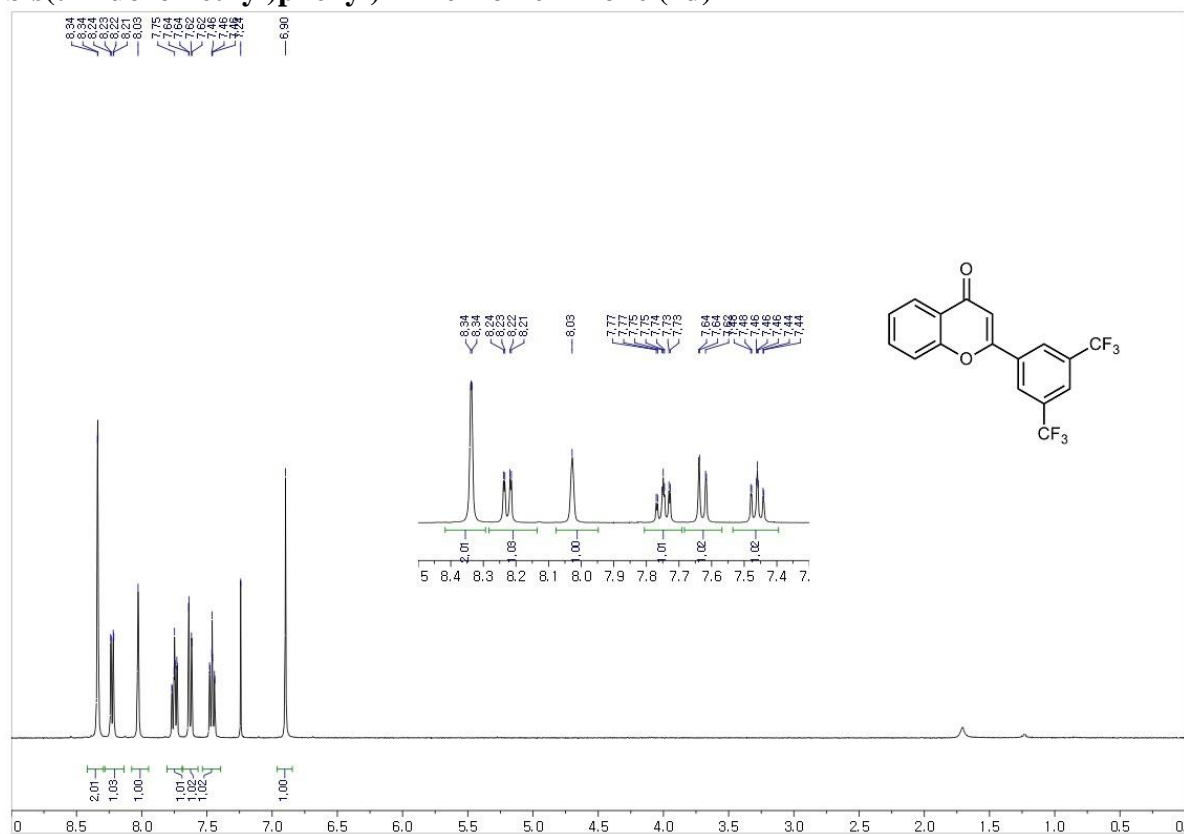

400 Mhz, <sup>1</sup>H NMR in Chloroform-d

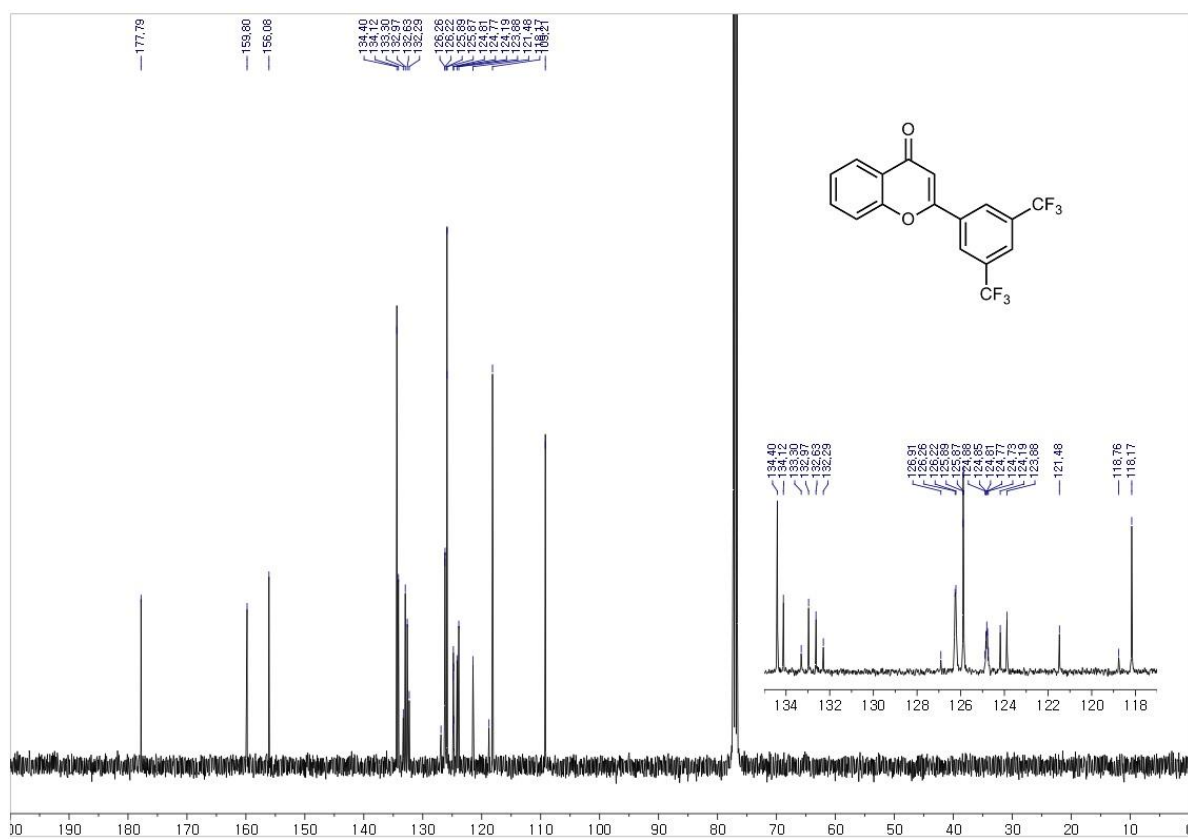

100 Mhz, <sup>13</sup>C NMR in Chloroform-d



**2-(3,5-difluorophenyl)-4H-chromen-4-one (4e).**

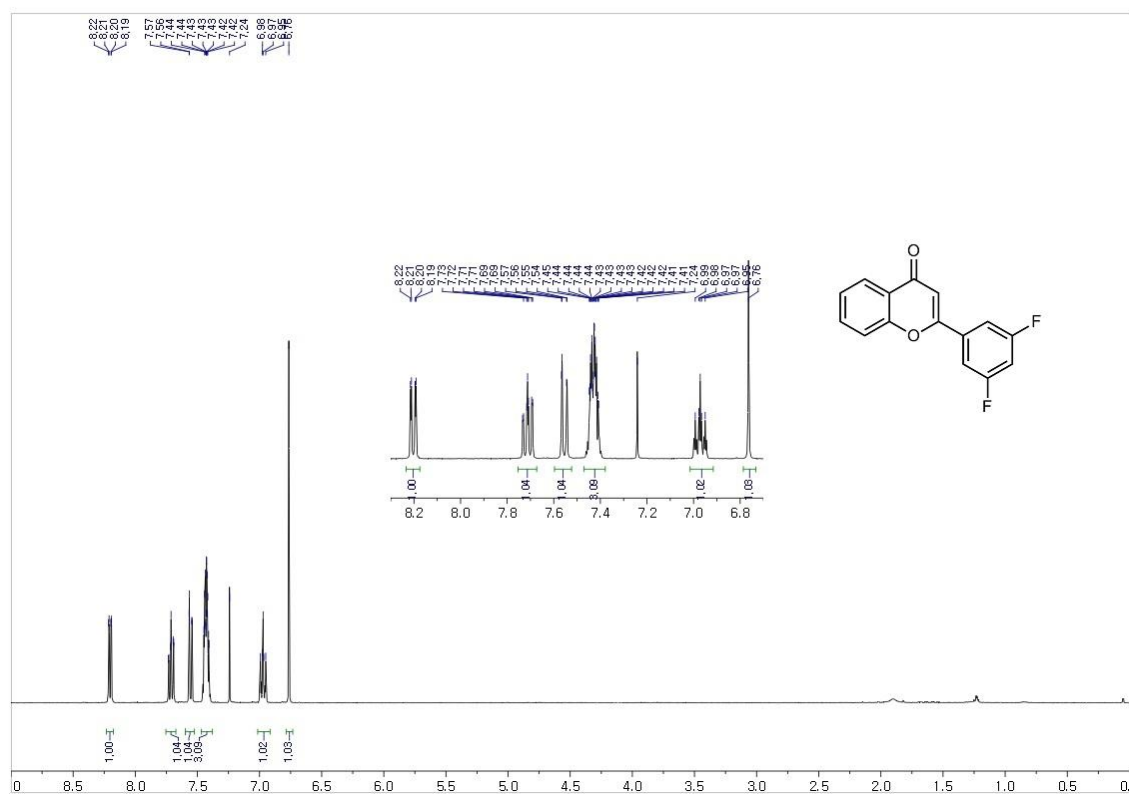

400 Mhz, <sup>1</sup>H NMR in Chloroform-d

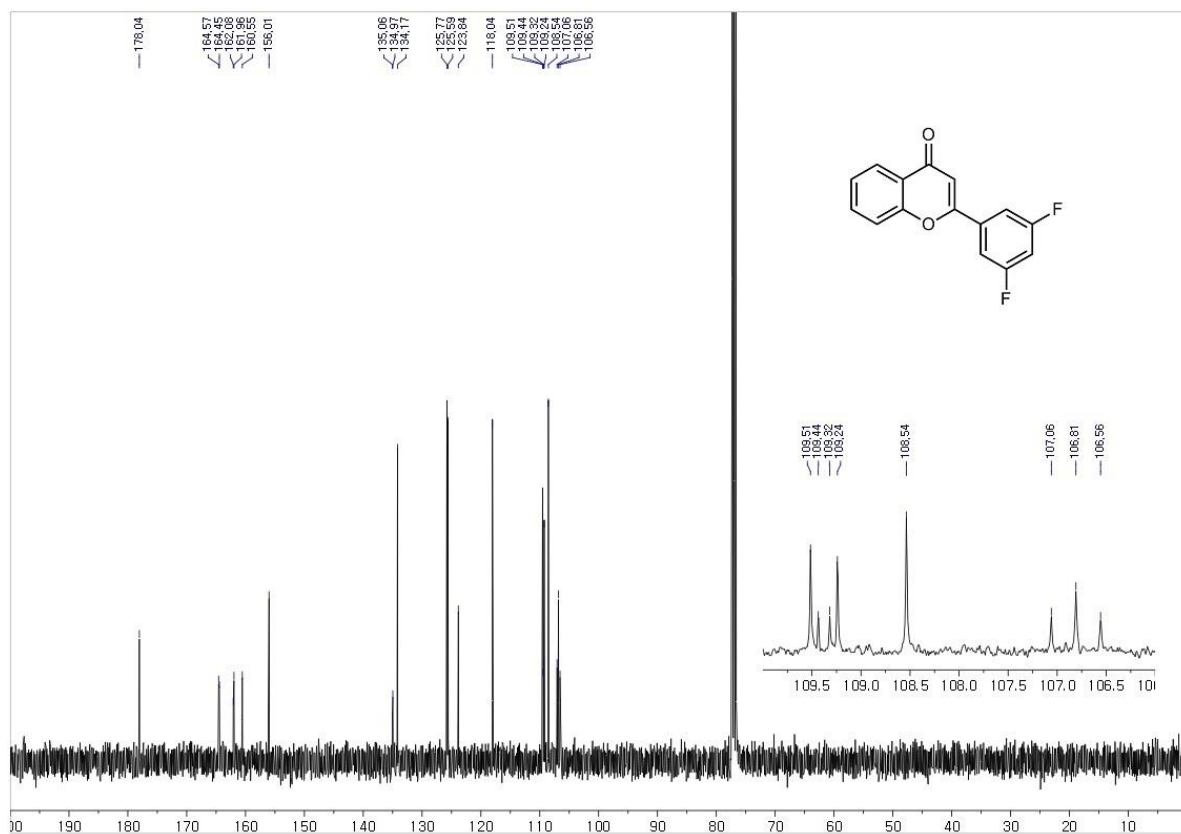

100 Mhz, <sup>13</sup>C NMR in Chloroform- d

## 2-(4-nitrophenyl)-4H-chromen-4-one (4f)

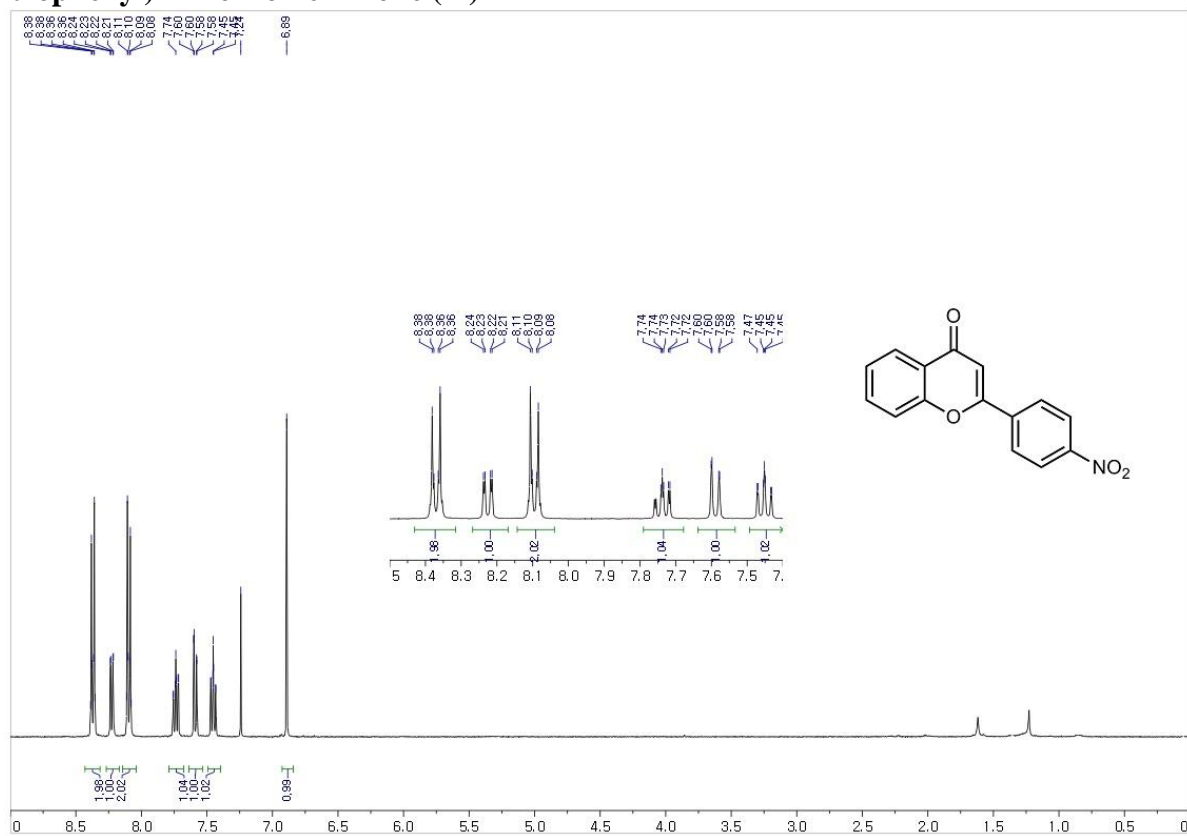

400 Mhz, <sup>1</sup>H NMR in Chloroform-d

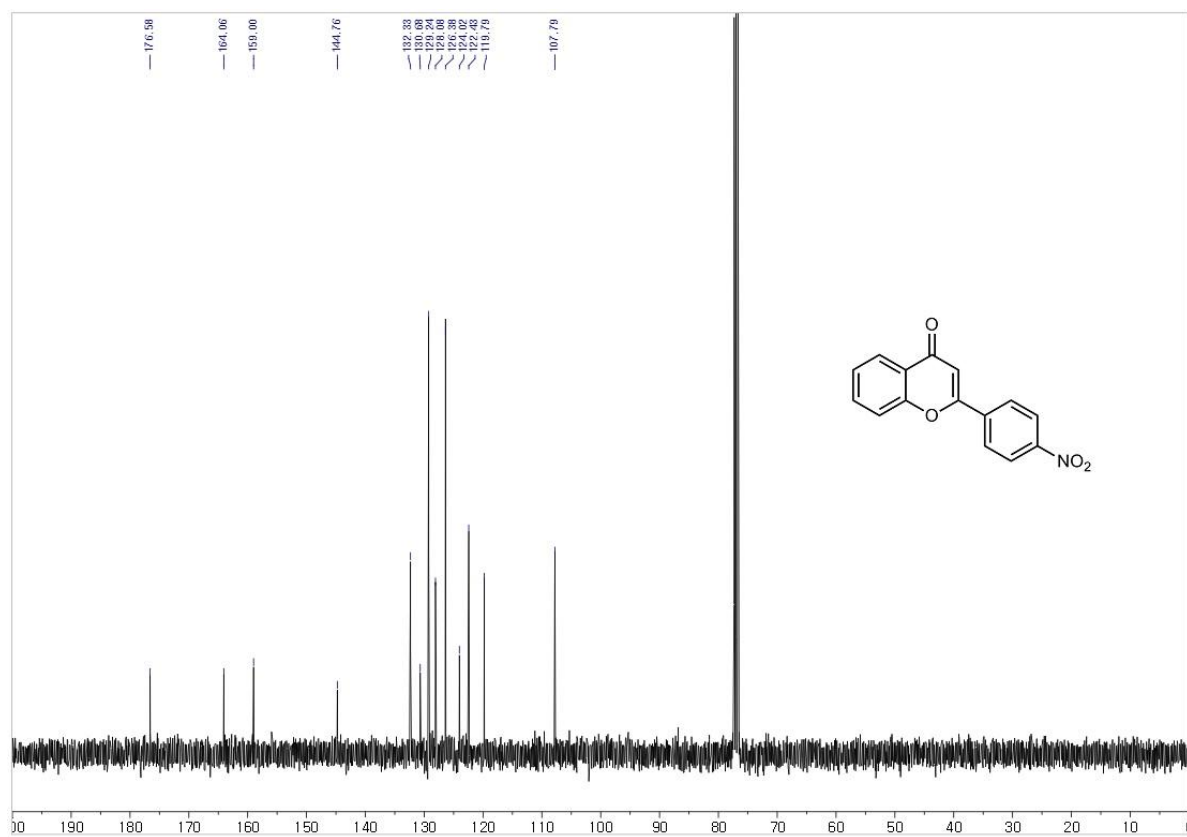

100 Mhz, <sup>13</sup>C NMR in Chloroform-d

**2-(4-acetylphenyl)-4H-chromen-4-one (4g)**

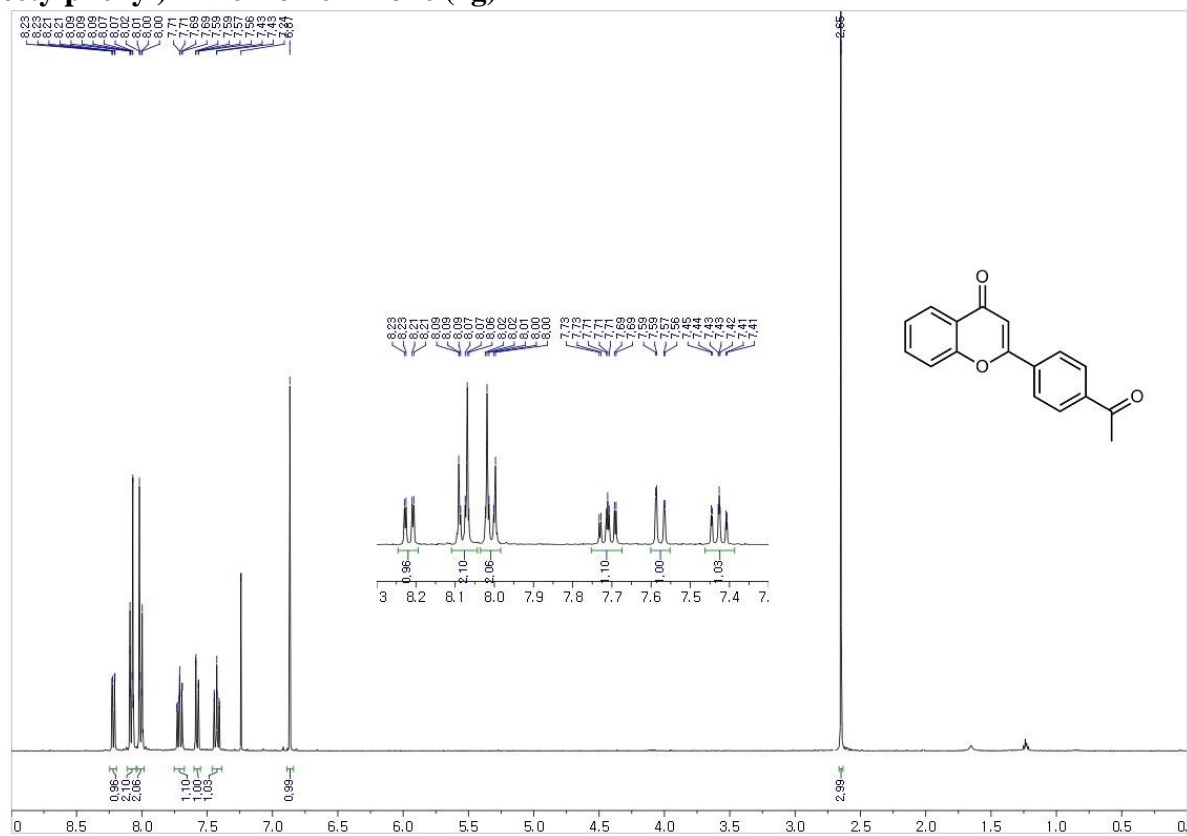

400 Mhz, <sup>1</sup>H NMR in Chloroform-d

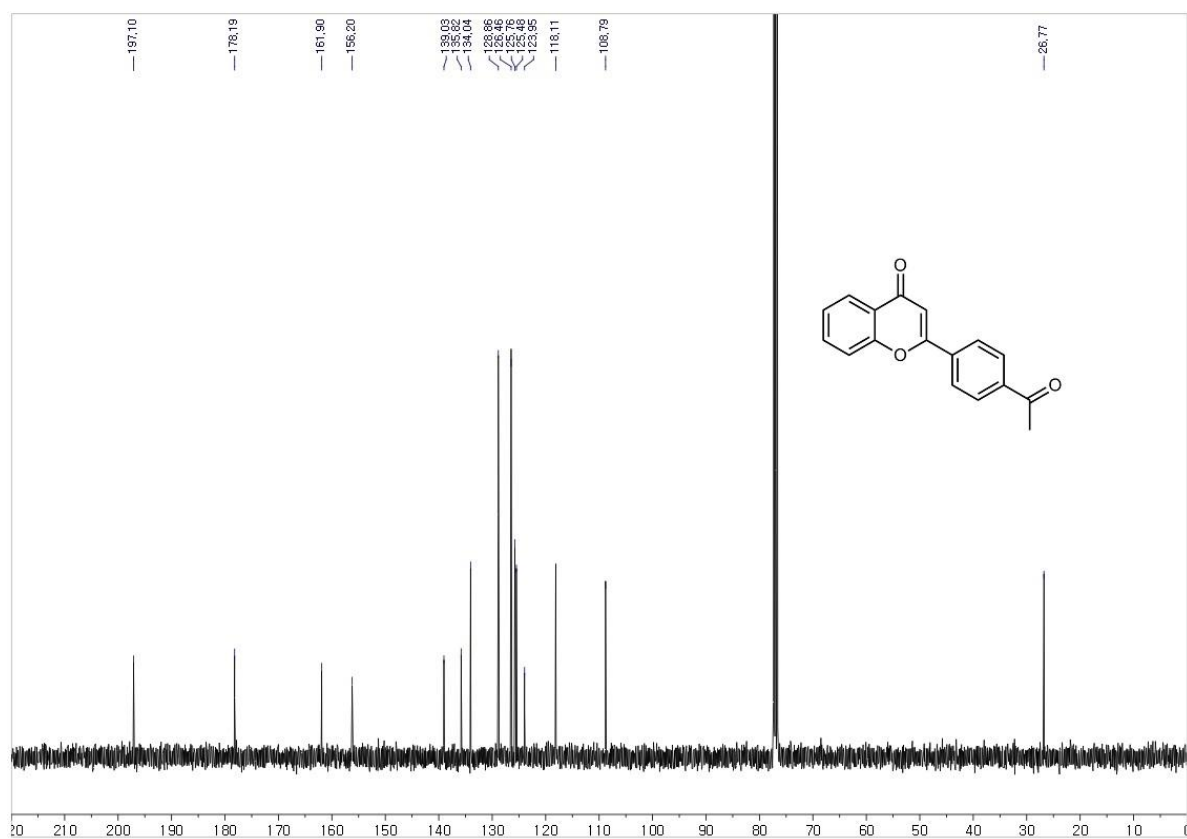

100 Mhz, <sup>13</sup>C NMR in Chloroform-d

**2-(3-fluoro-4-methoxyphenyl)-4H-chromen-4-one (4h)**

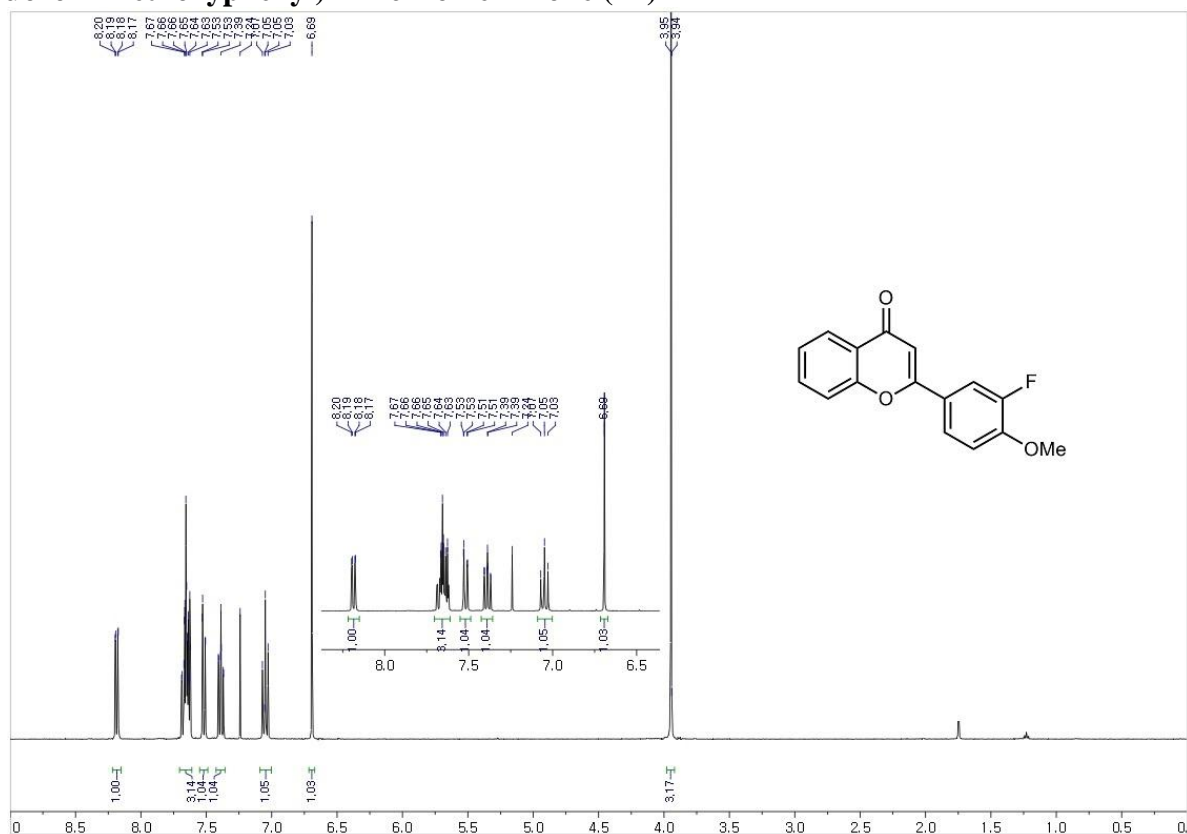

400 Mhz, <sup>1</sup>H NMR in Chloroform-d

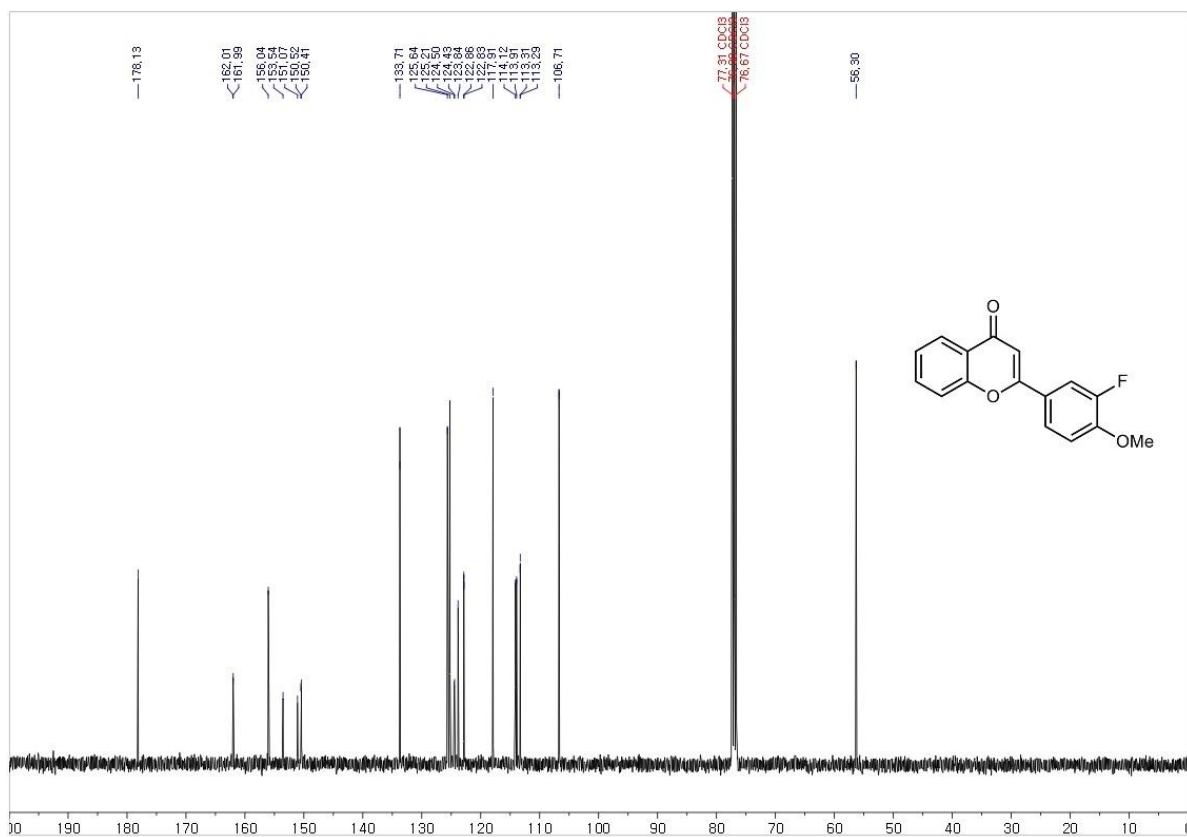

100 Mhz, <sup>13</sup>C NMR in Chloroform-d

**2-(naphthalen-2-yl)-4H-chromen-4-one (4i)**

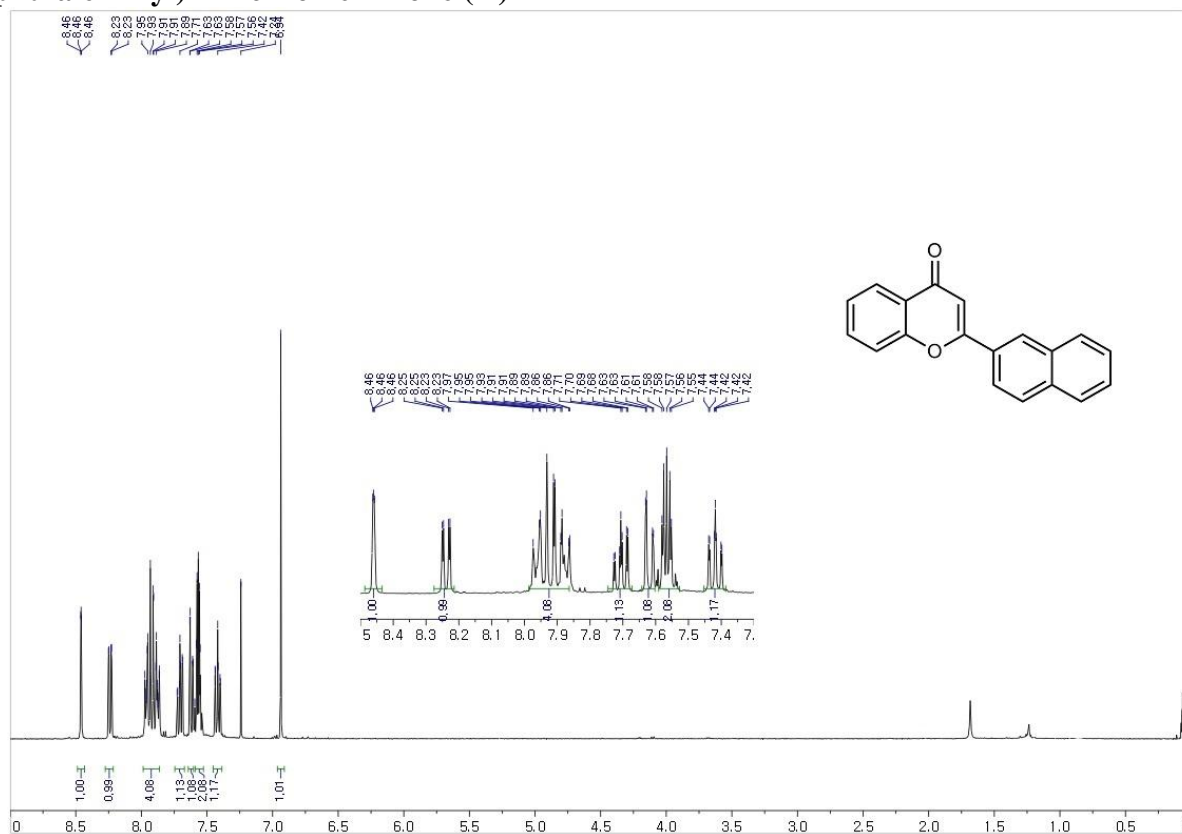

400 Mhz, <sup>1</sup>H NMR in Chloroform-d

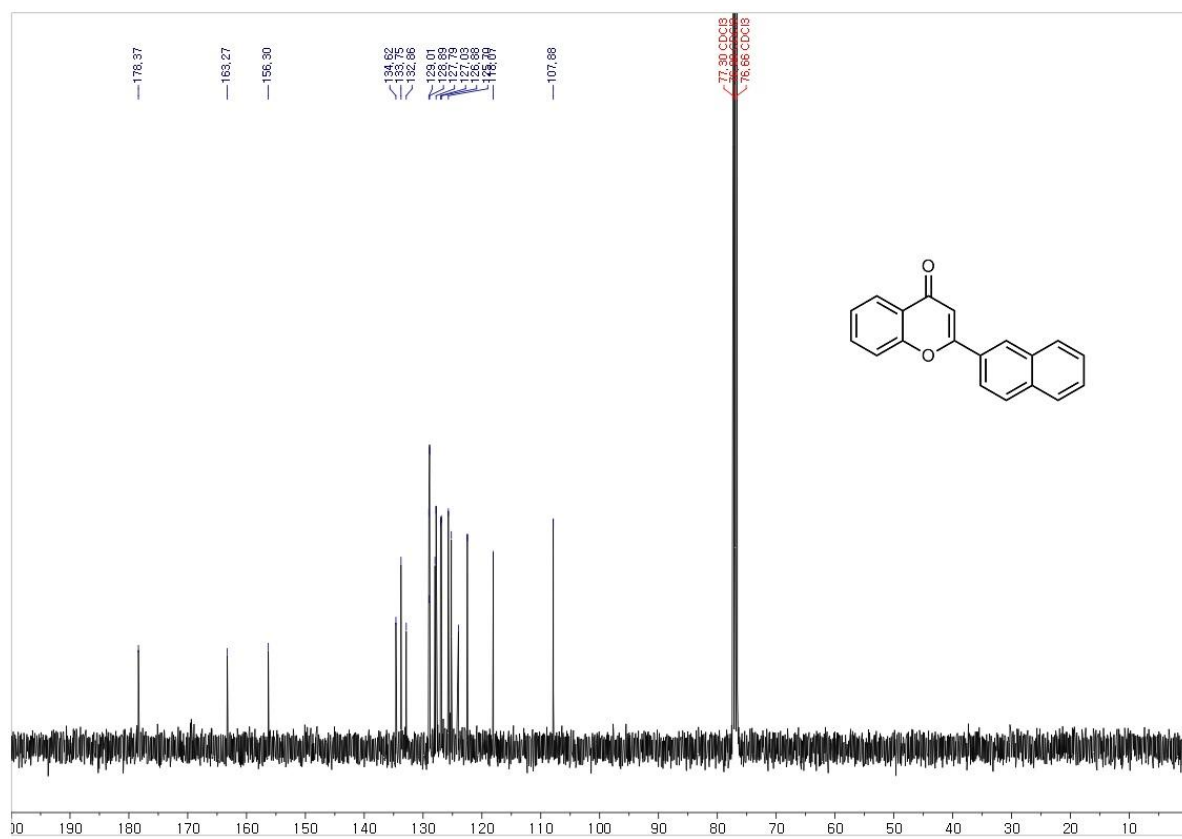

100 Mhz, <sup>13</sup>C NMR in Chloroform-d

## 2-(3,4-dichlorophenyl)-4H-chromen-4-one (4j)

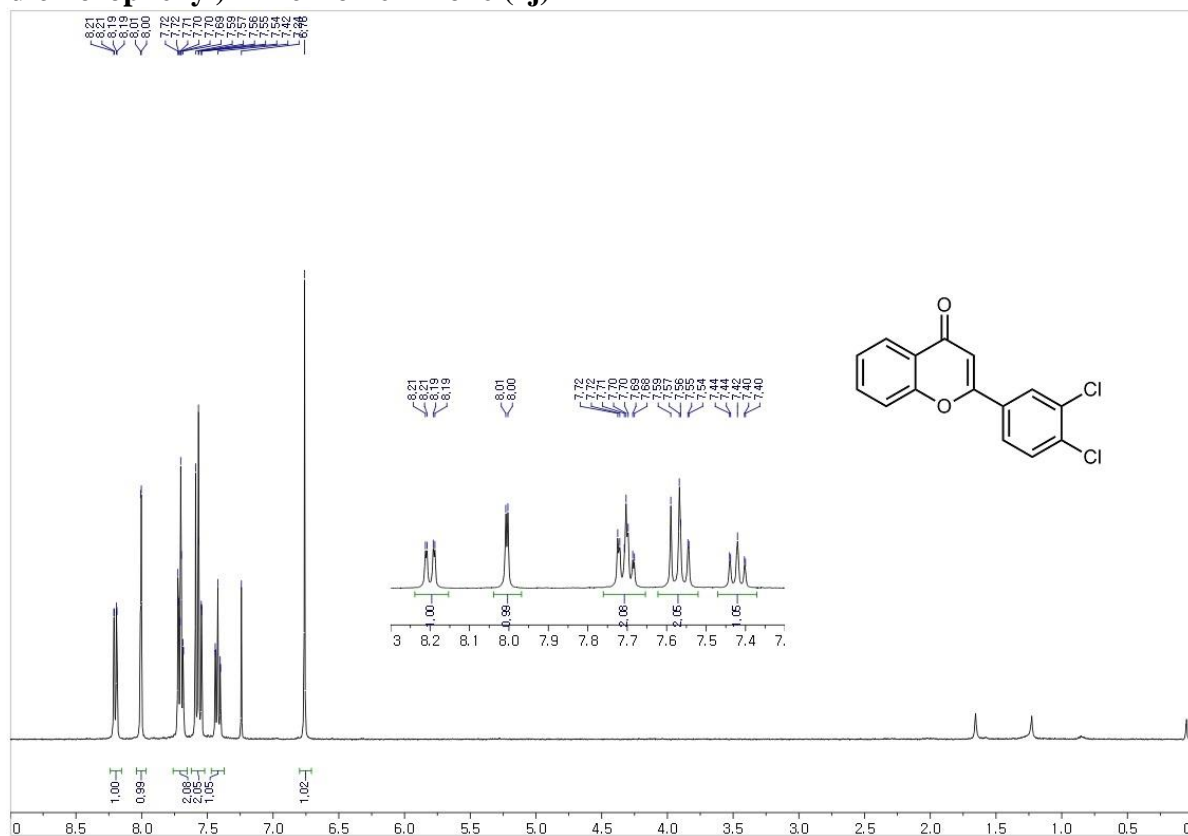

400 Mhz, <sup>1</sup>H NMR in Chloroform-d

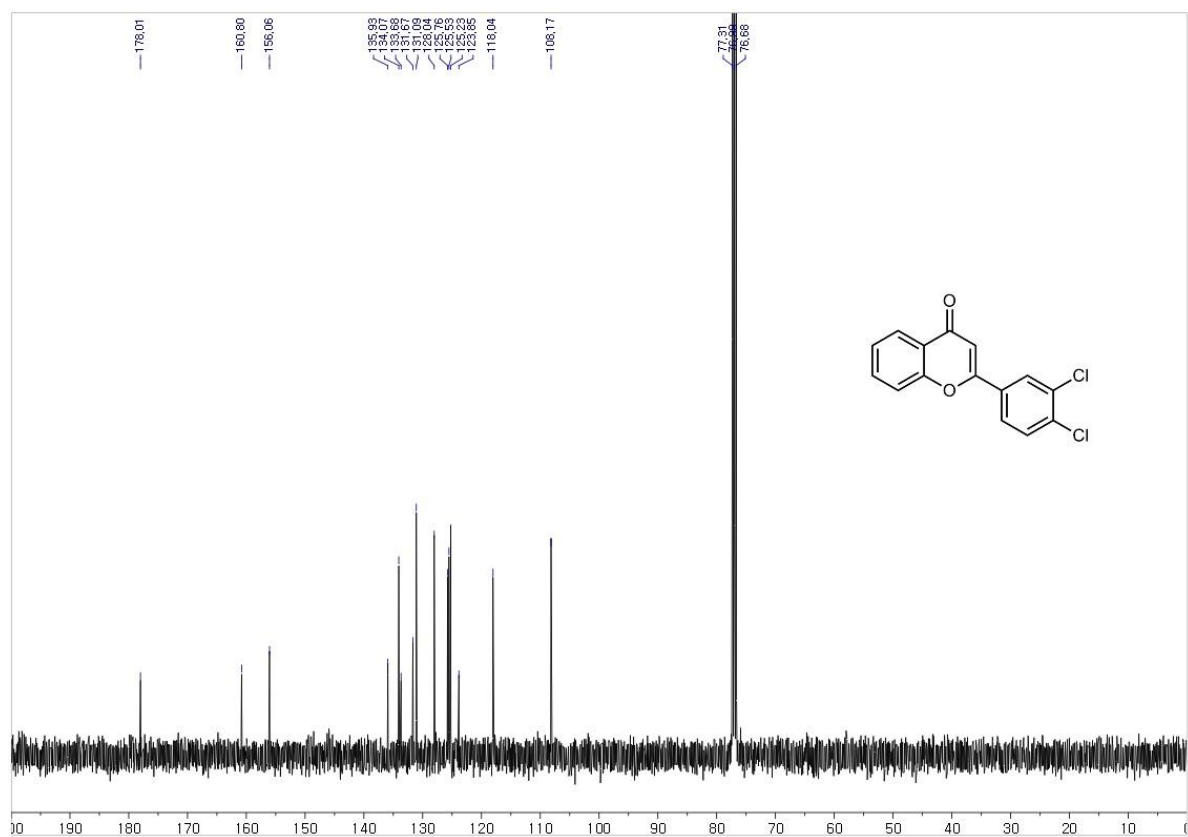

100 Mhz, <sup>13</sup>C NMR in Chloroform-d

**2-(3,4-dimethoxyphenyl)-4H-chromen-4-one (4k)**

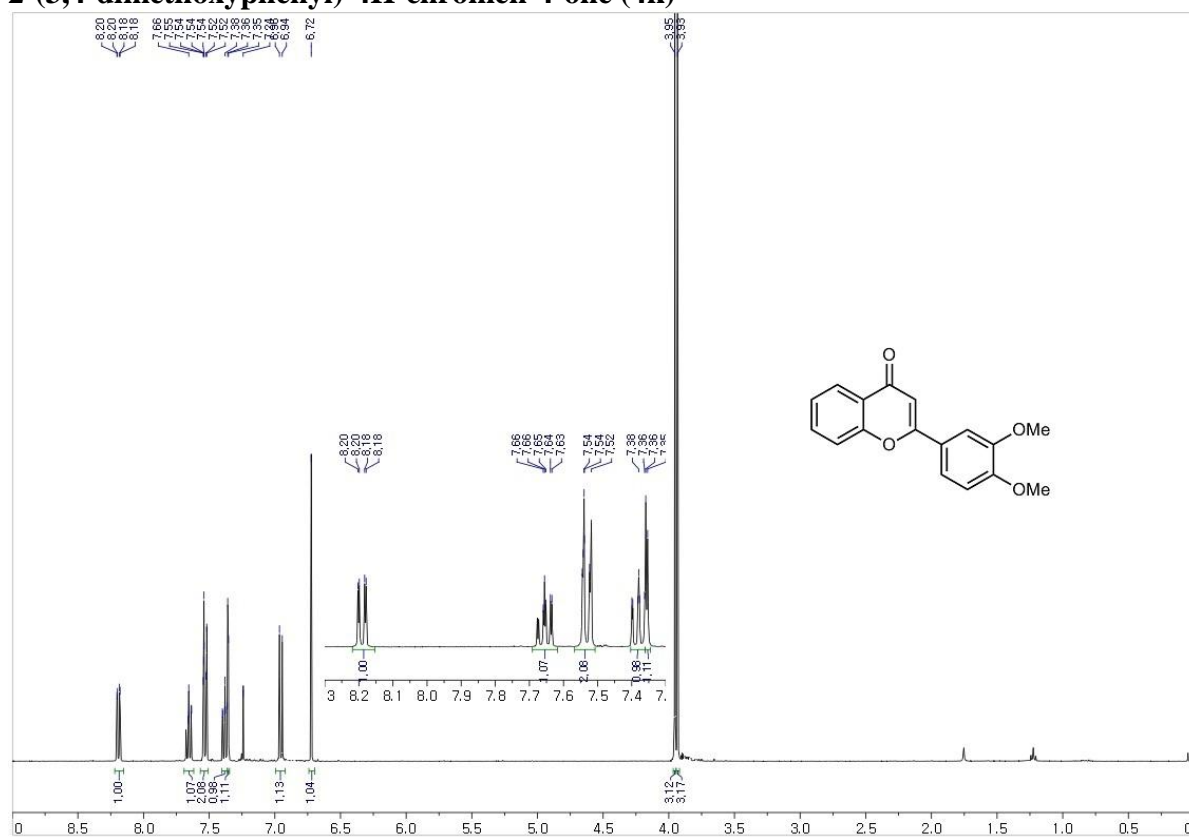

400 Mhz, <sup>1</sup>H NMR in Chloroform-d

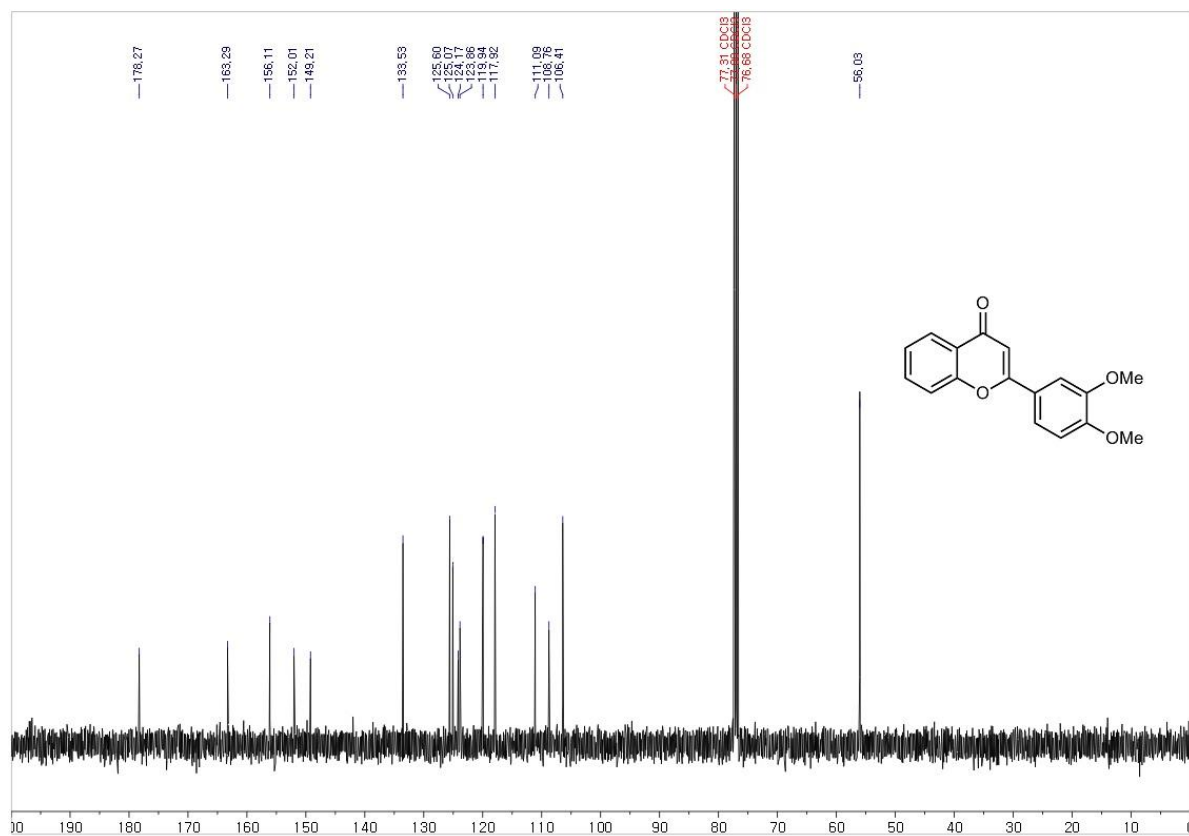

100 Mhz, <sup>13</sup>C NMR in Chloroform-d

## 2-(4-(tert-butyl)phenyl)-4H-chromen-4-one (4l)

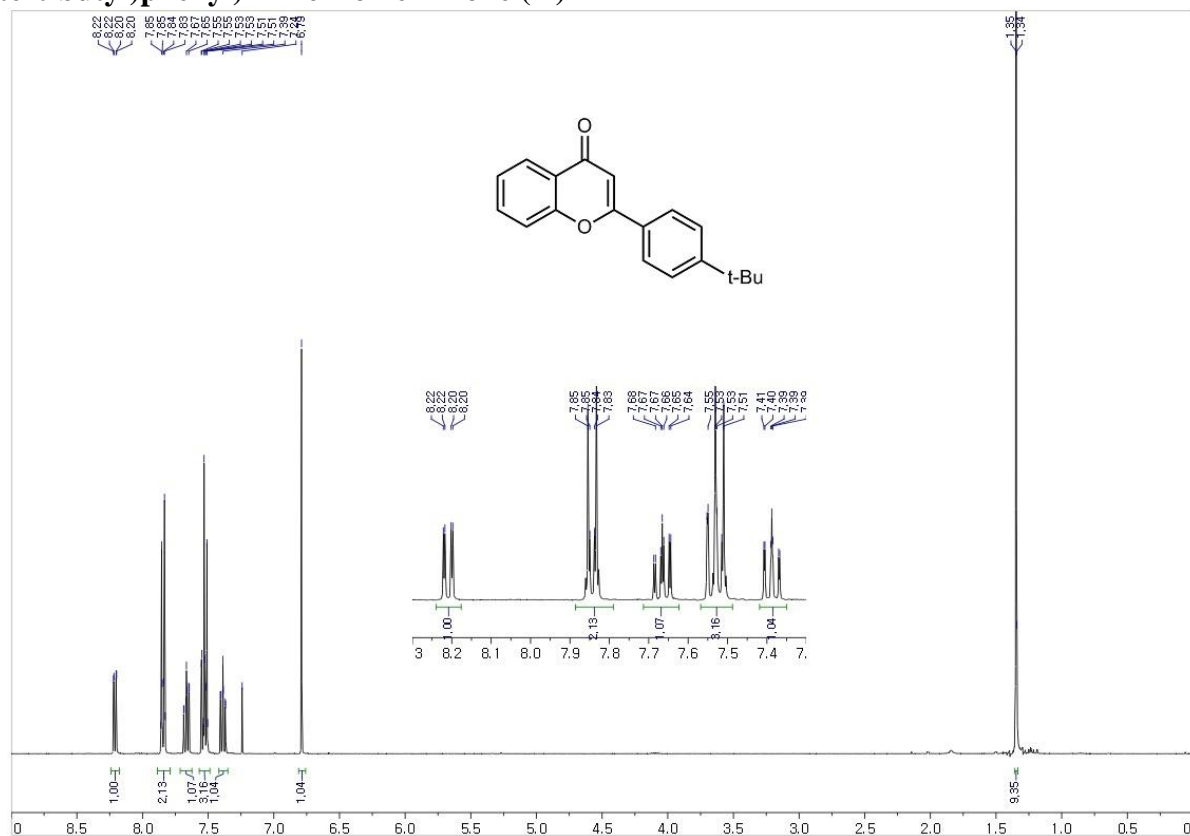

400 Mhz, <sup>1</sup>H NMR in Chloroform-d

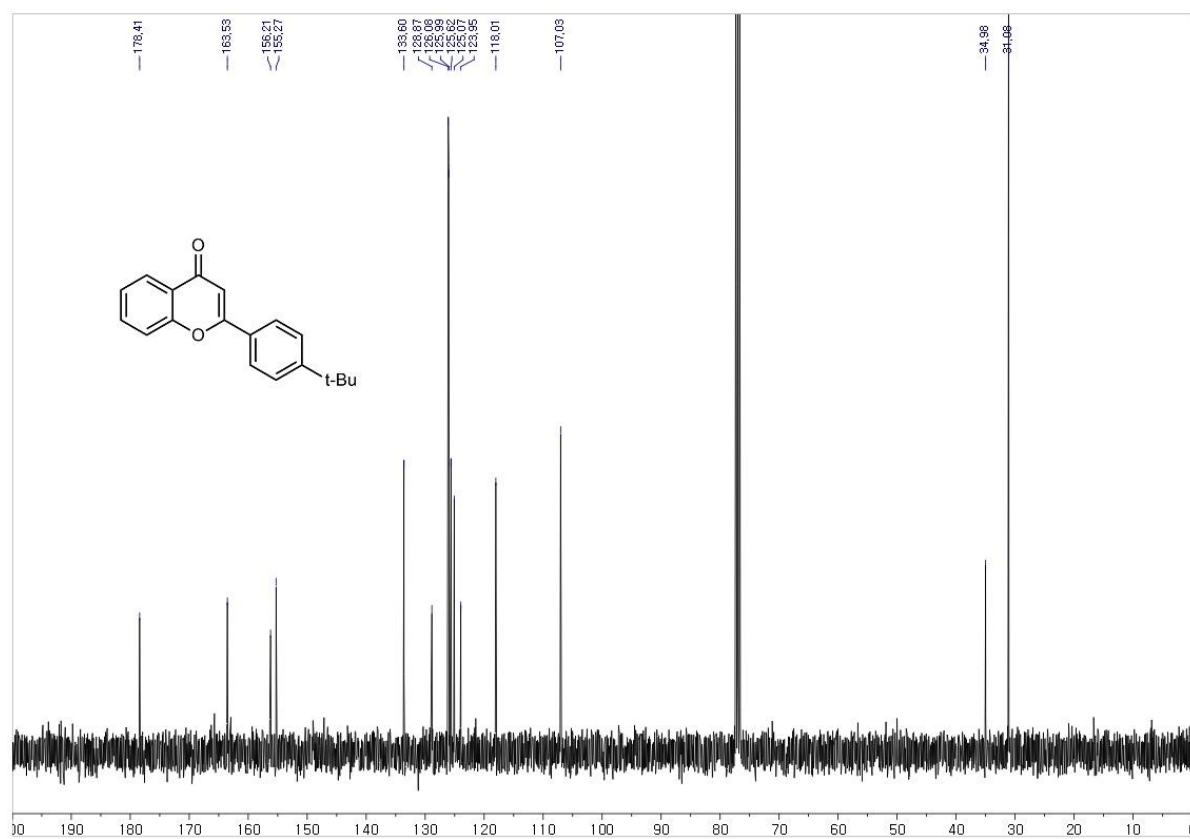

100 Mhz, <sup>13</sup>C NMR in Chloroform-d



## 2-(3-bromophenyl)-4H-chromen-4-one (4m)

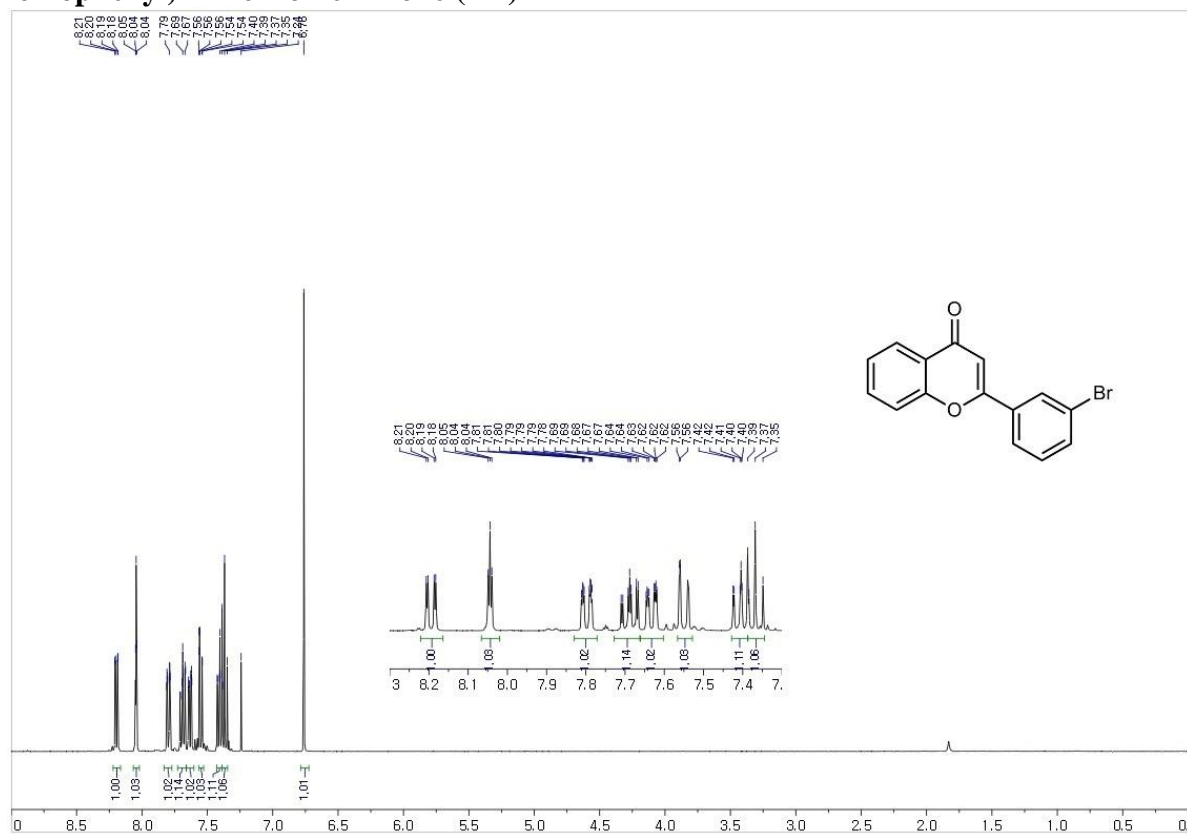

400 Mhz, <sup>1</sup>H NMR in Chloroform-d

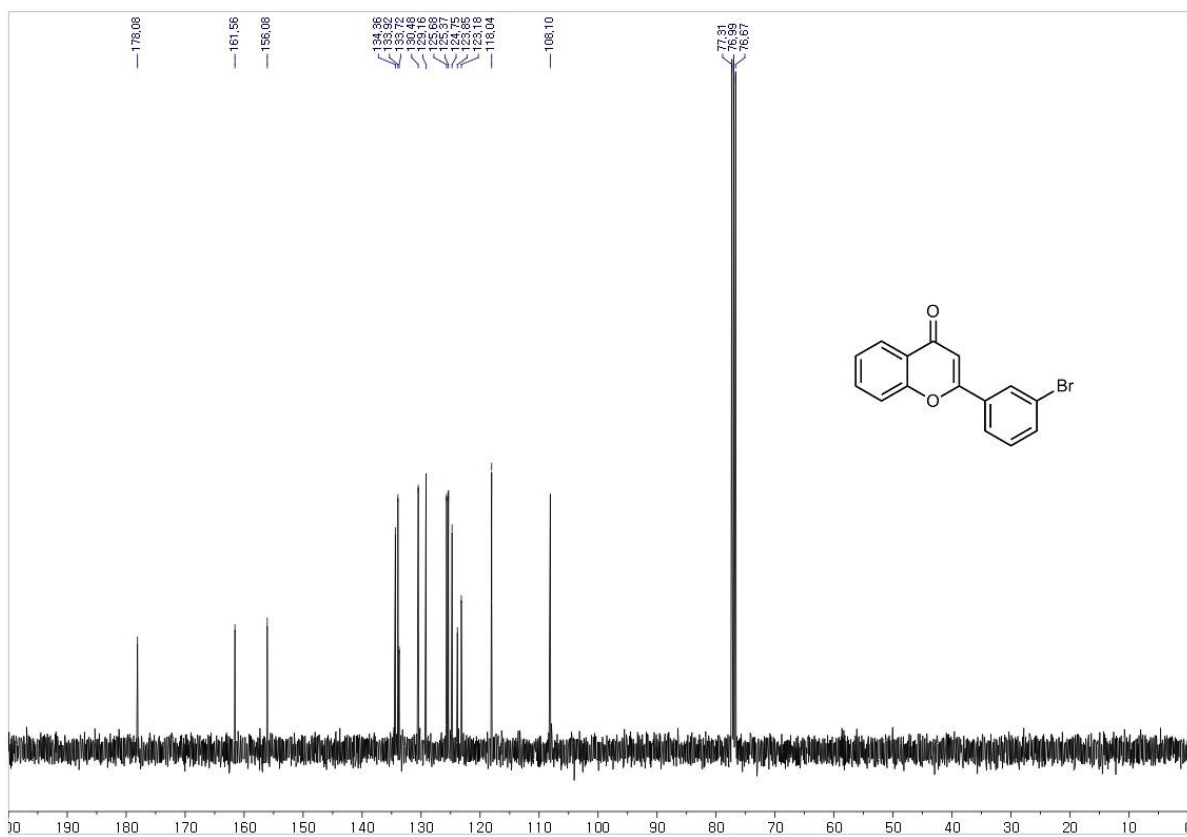

100 Mhz, <sup>13</sup>C NMR in Chloroform-d



**2-(4-(trimethylsilyl)phenyl)-4H-chromen-4-one (4o)**

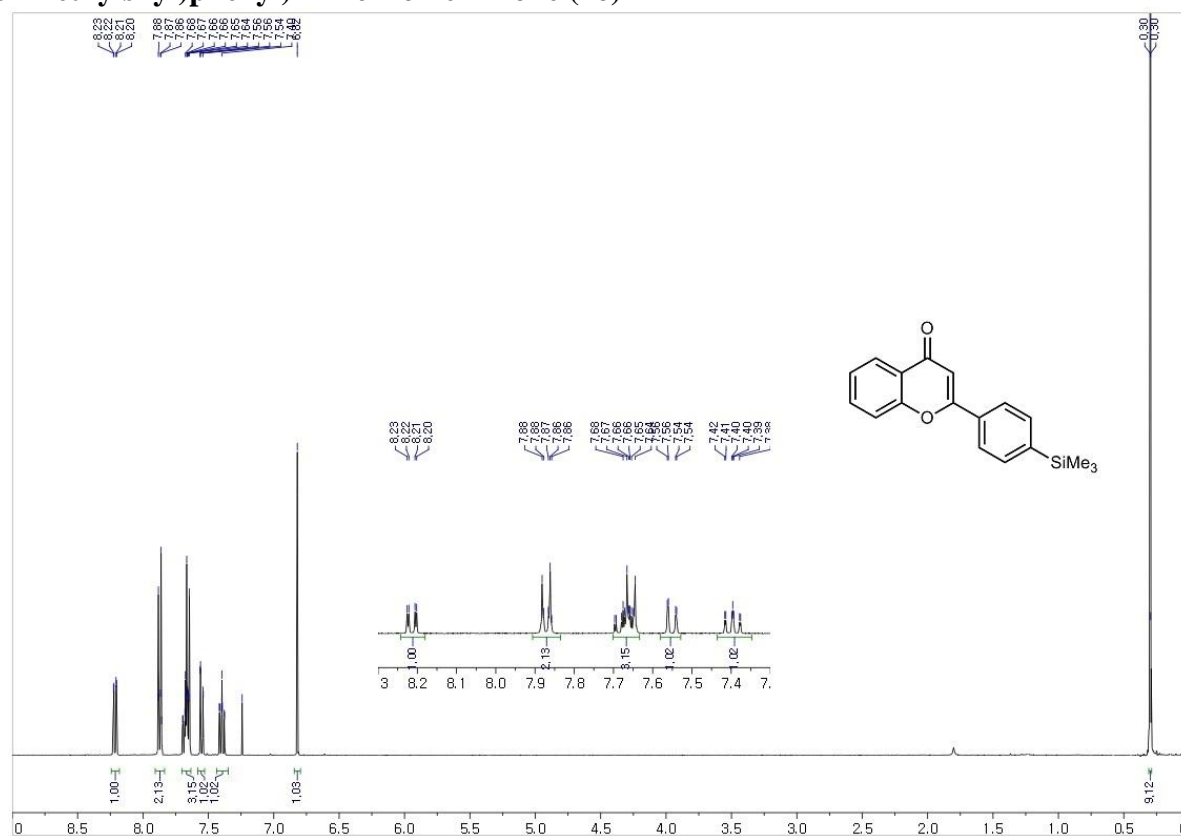

400 Mhz, <sup>1</sup>H NMR in Chloroform-d

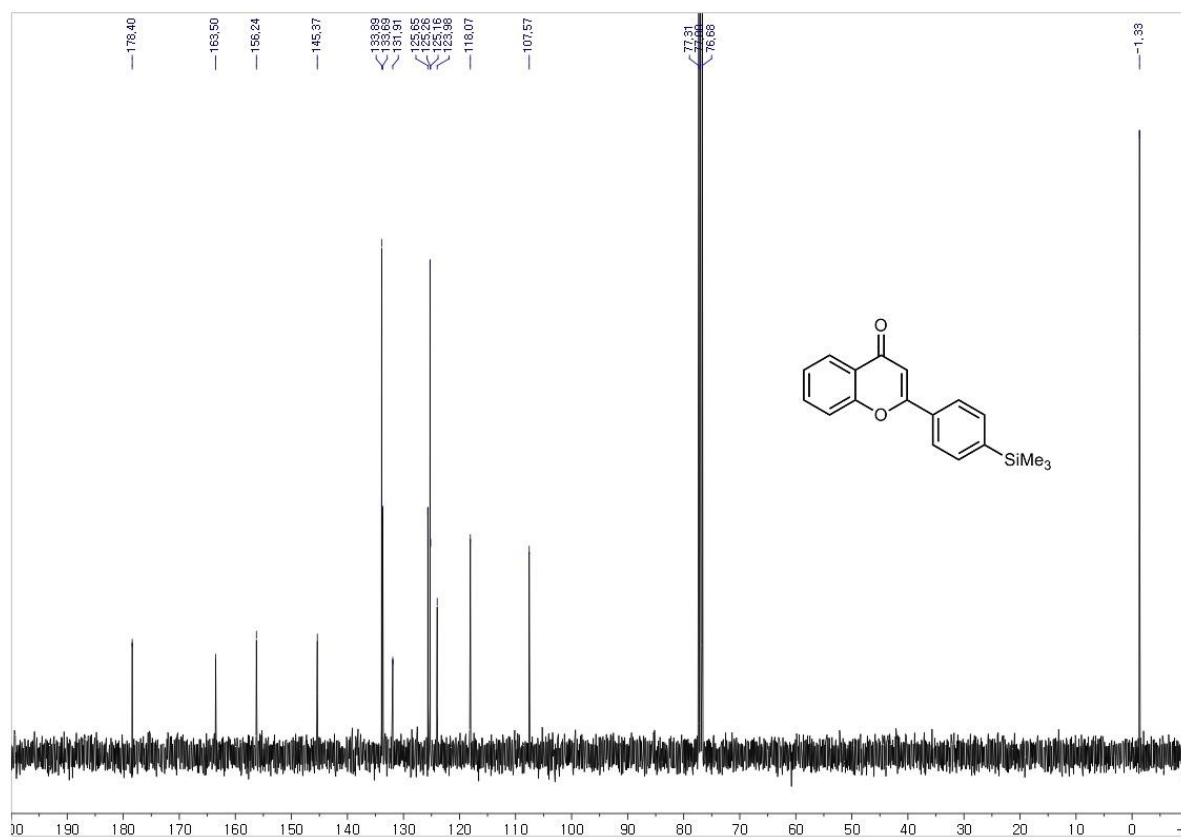

100 Mhz, <sup>13</sup>C NMR in Chloroform-d

## 2-(4-chlorophenyl)-4H-chromen-4-one (4p)

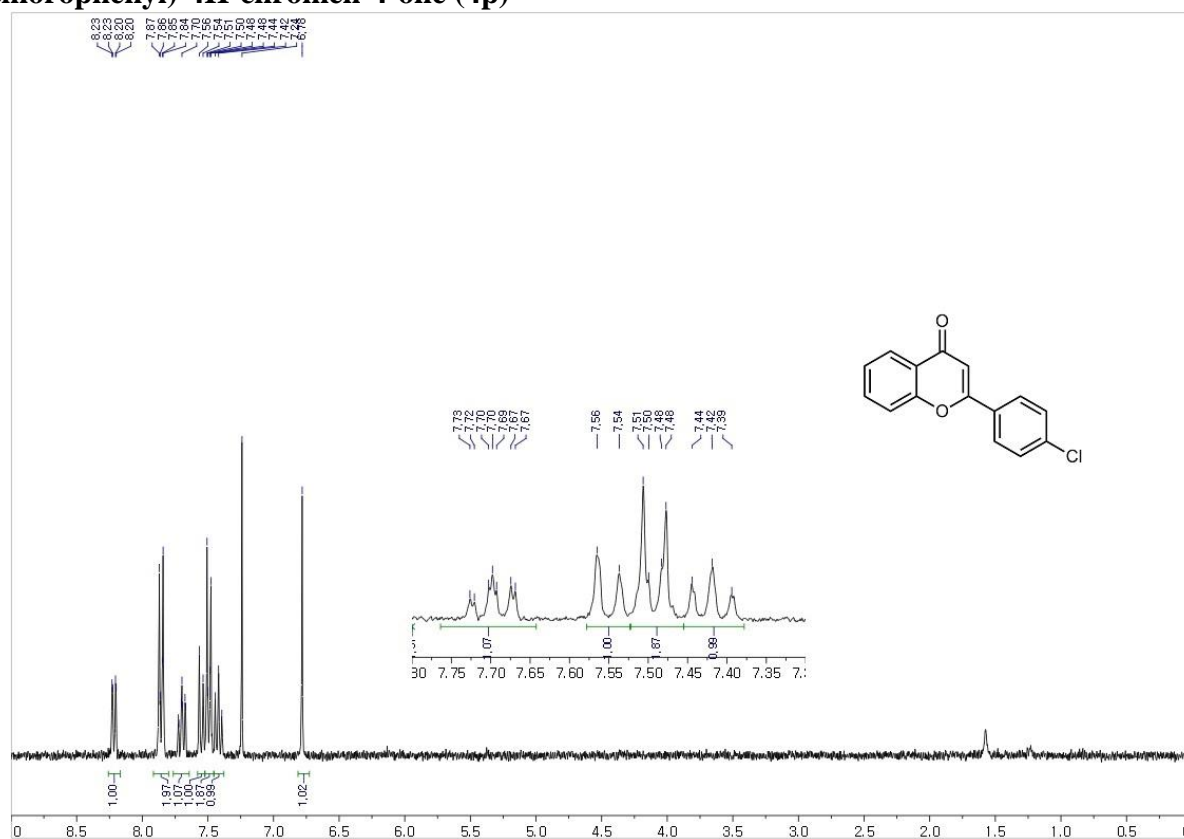

400 Mhz, <sup>1</sup>H NMR in Chloroform-d

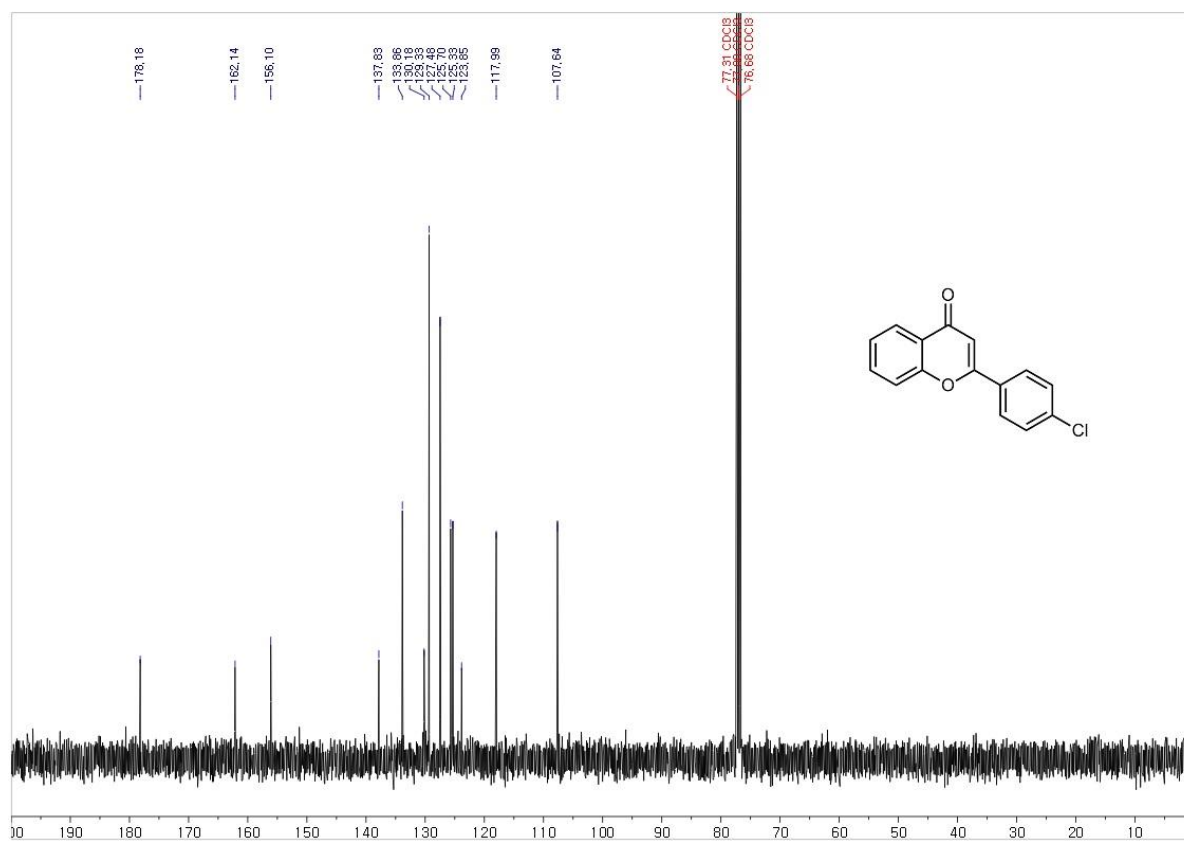

100 Mhz, <sup>13</sup>C NMR in Chloroform-d

## 2-(2-ethylphenyl)-4H-chromen-4-one (4q)

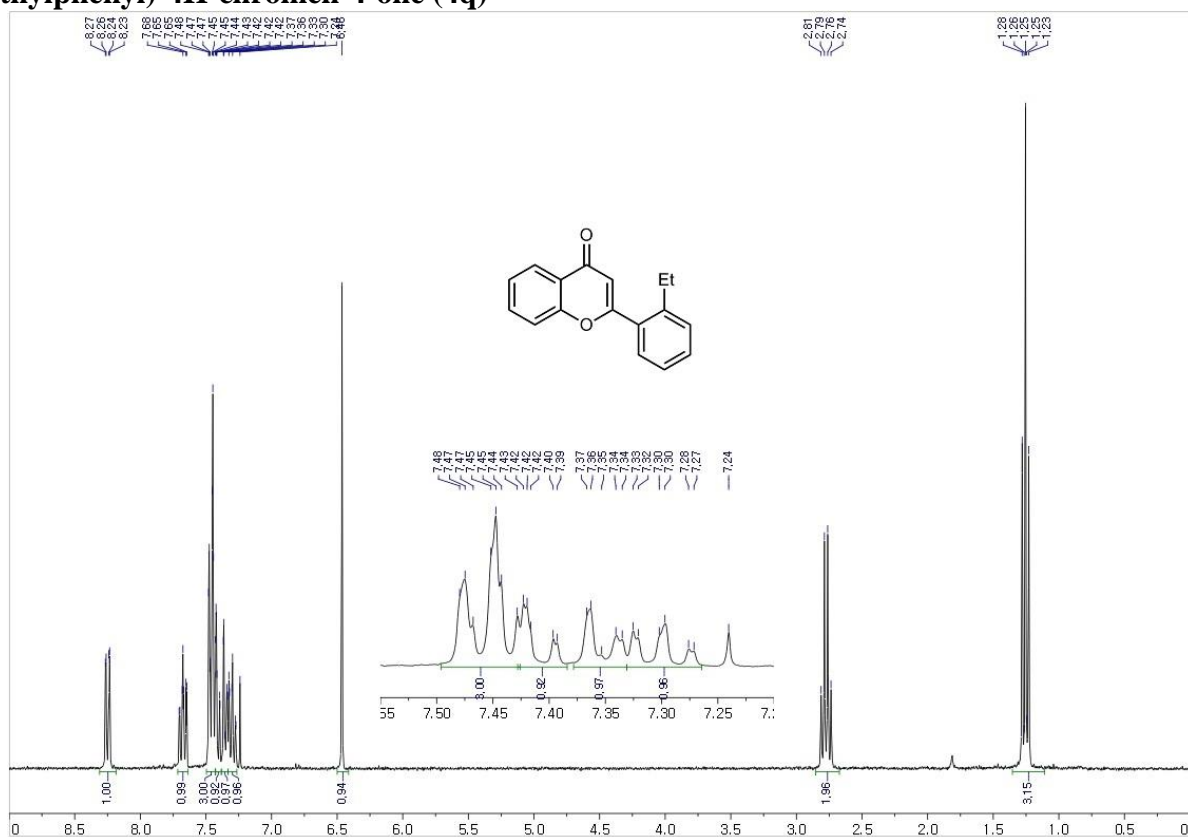

400 Mhz, <sup>1</sup>H NMR in Chloroform-d

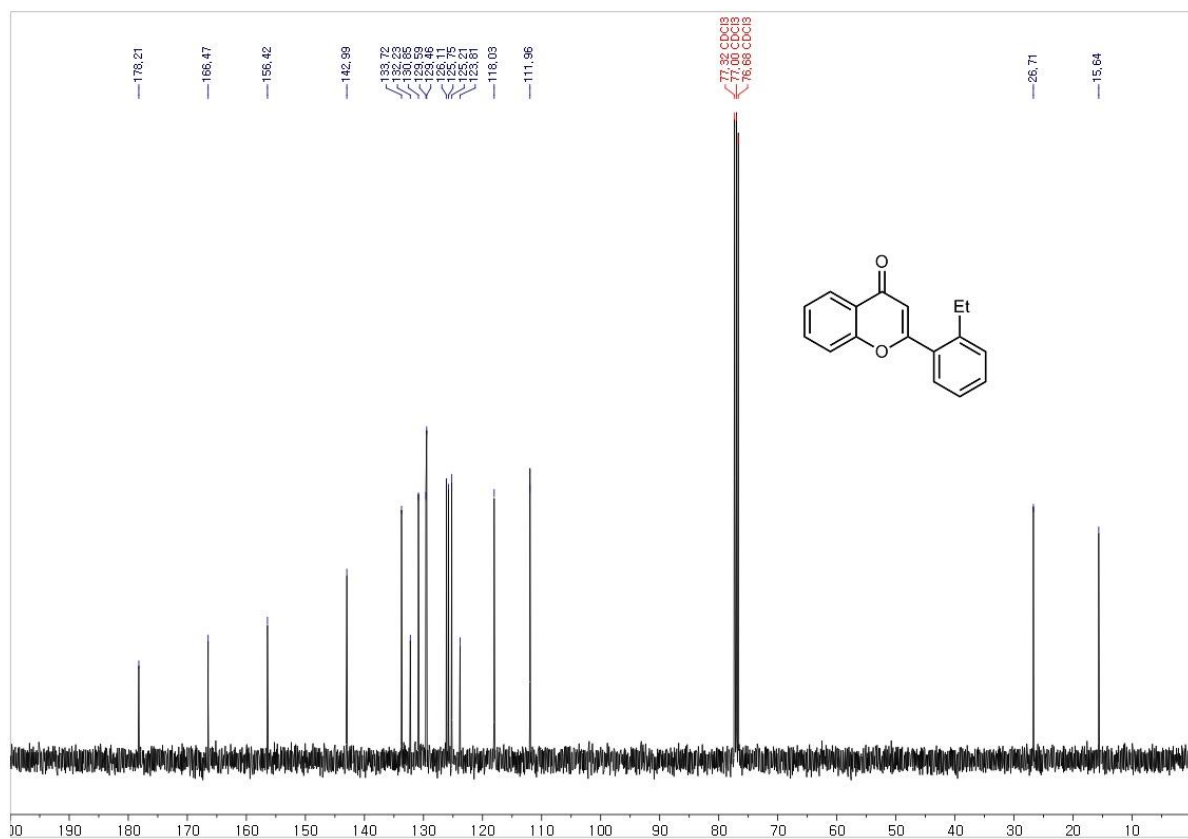

100 Mhz, <sup>13</sup>C NMR in Chloroform-d

**2-(3-methoxyphenyl)-4H-chromen-4-one (4r)**

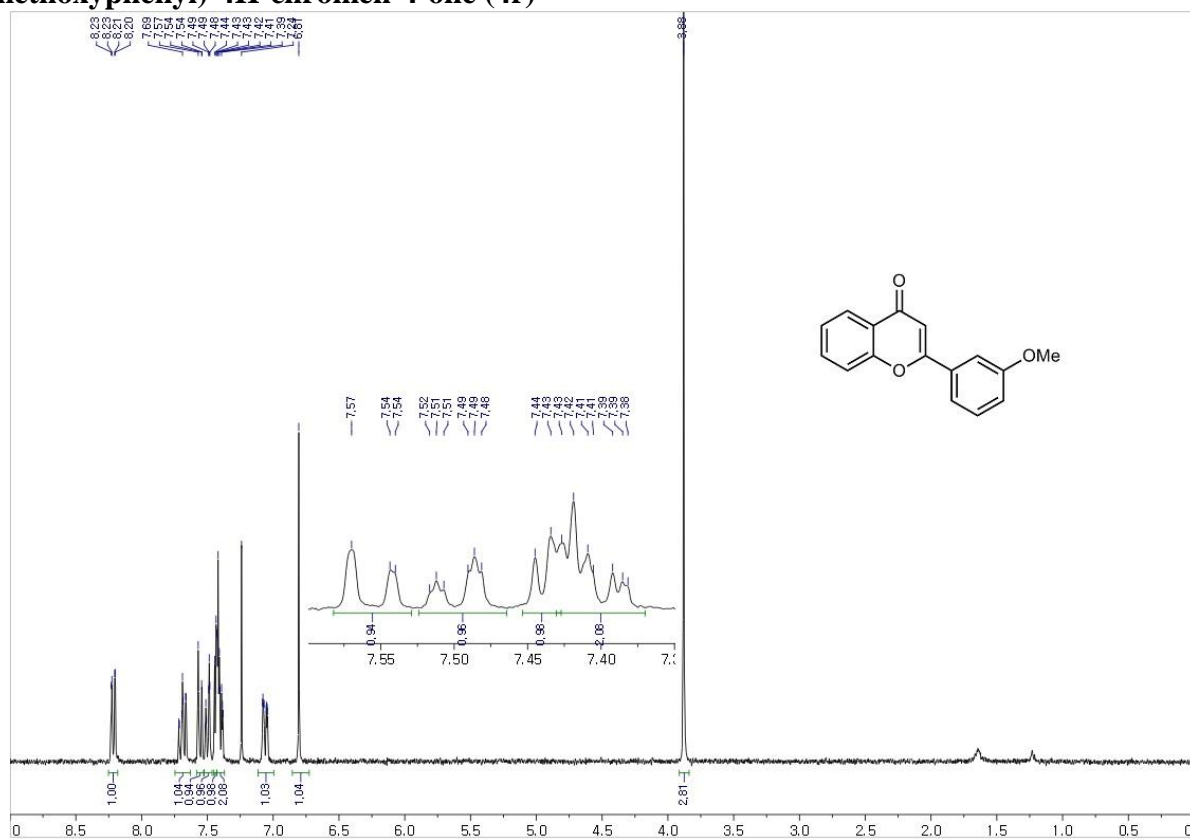

400 Mhz, <sup>1</sup>H NMR in Chloroform-d

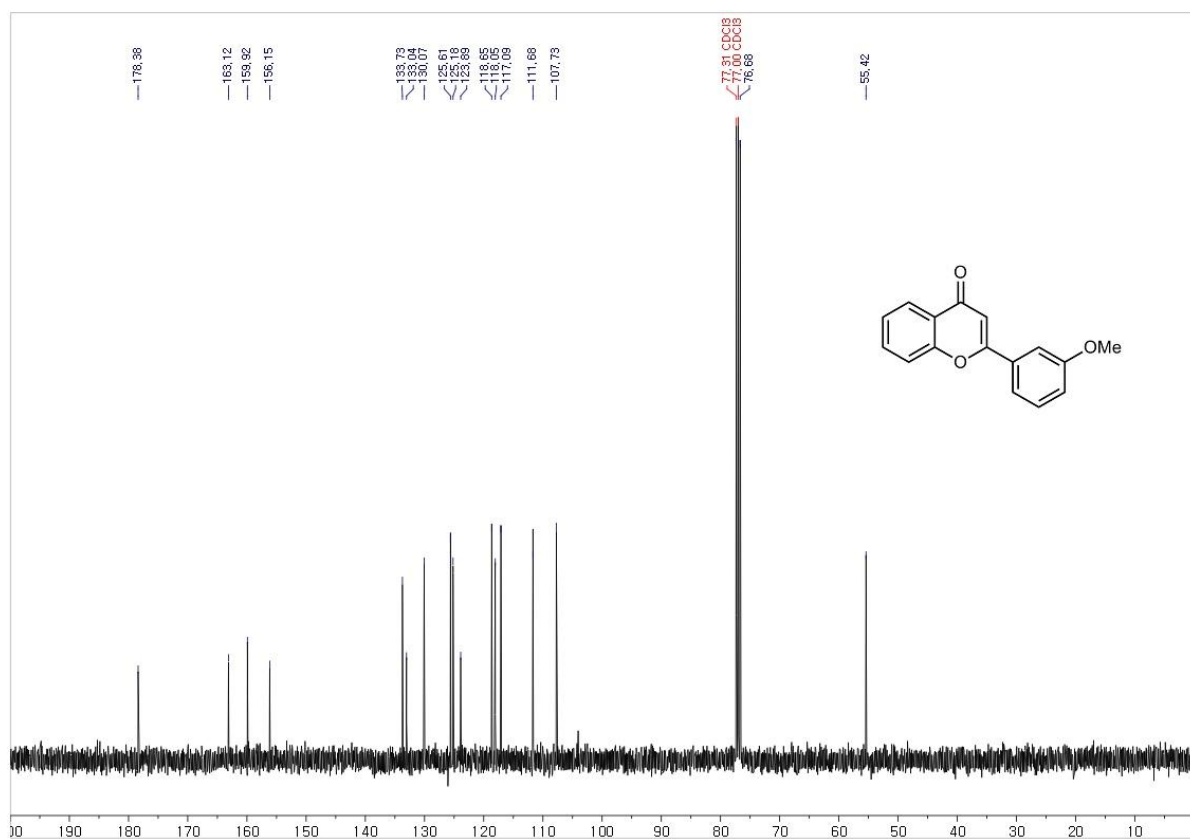

100 Mhz, <sup>13</sup>C NMR in Chloroform-d

## 2-(3-nitrophenyl)-4H-chromen-4-one (4s)

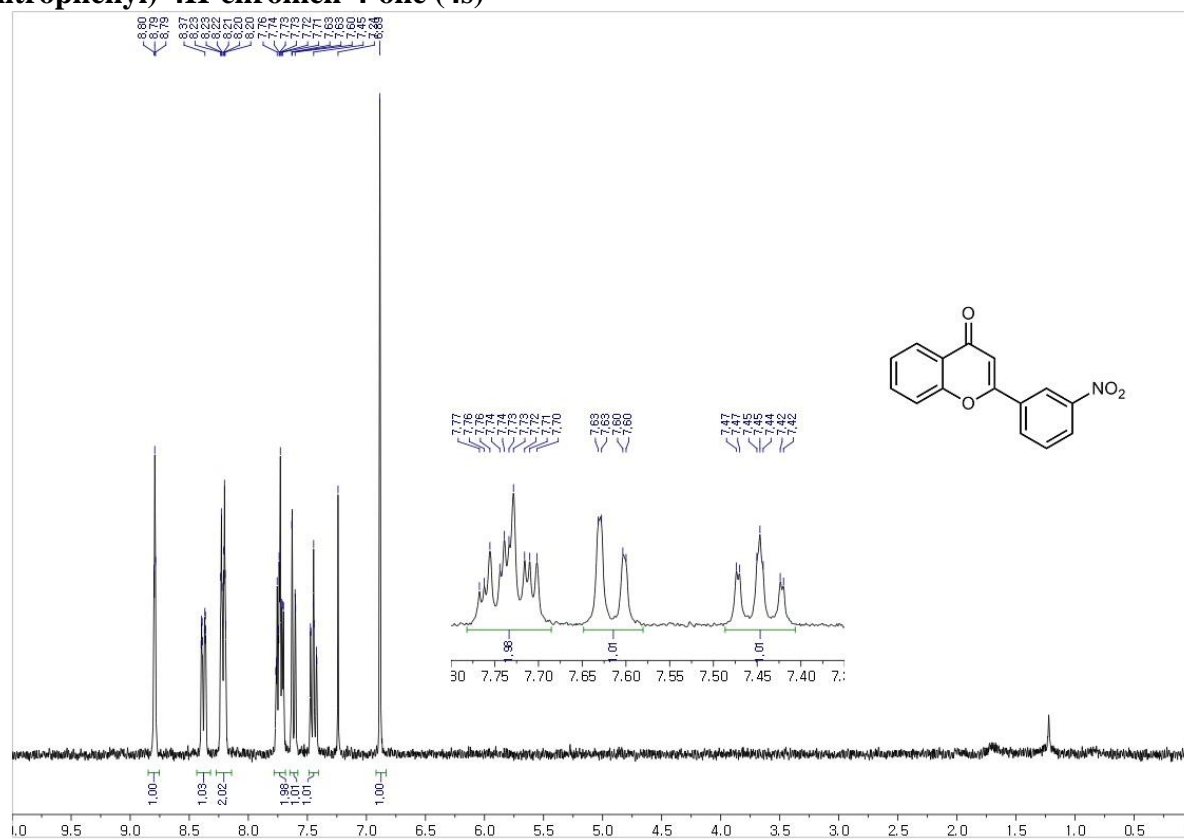





## 2-(3-fluorophenyl)-4H-chromen-4-one (4u)

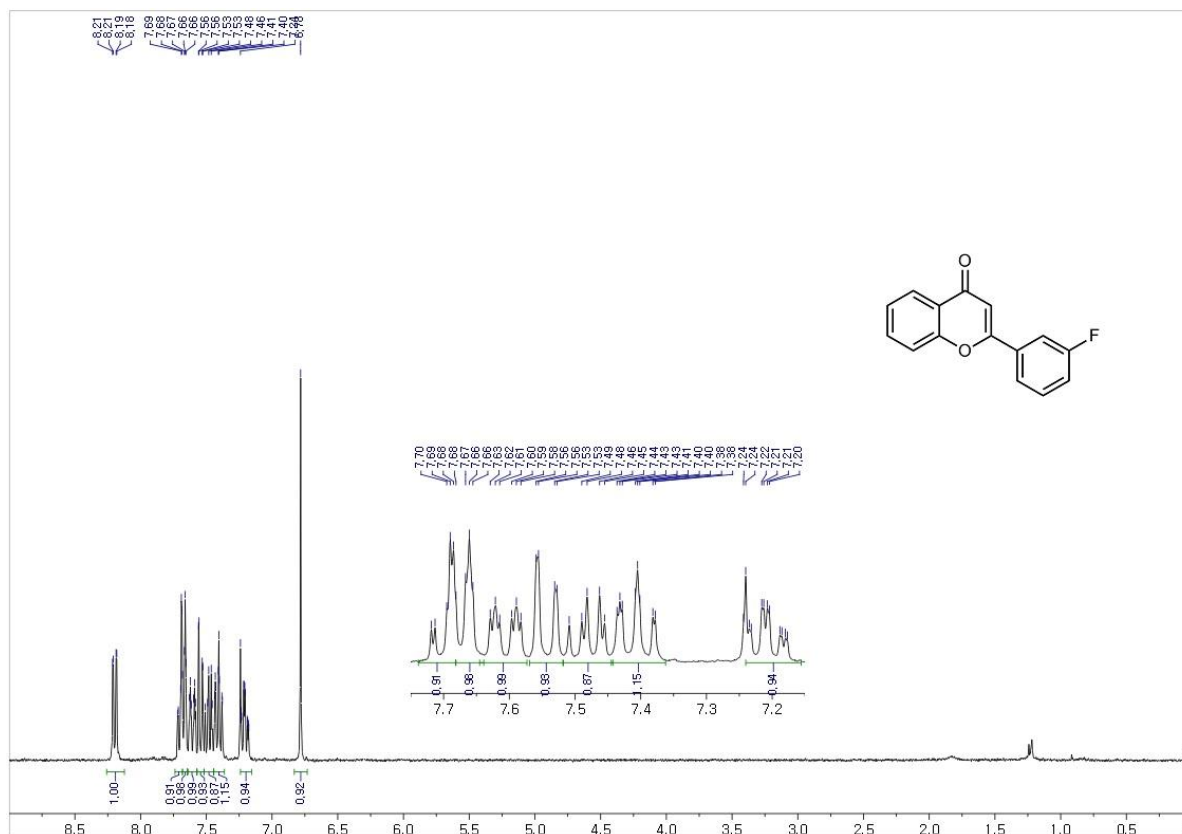

400 Mhz, <sup>1</sup>H NMR in Chloroform-d

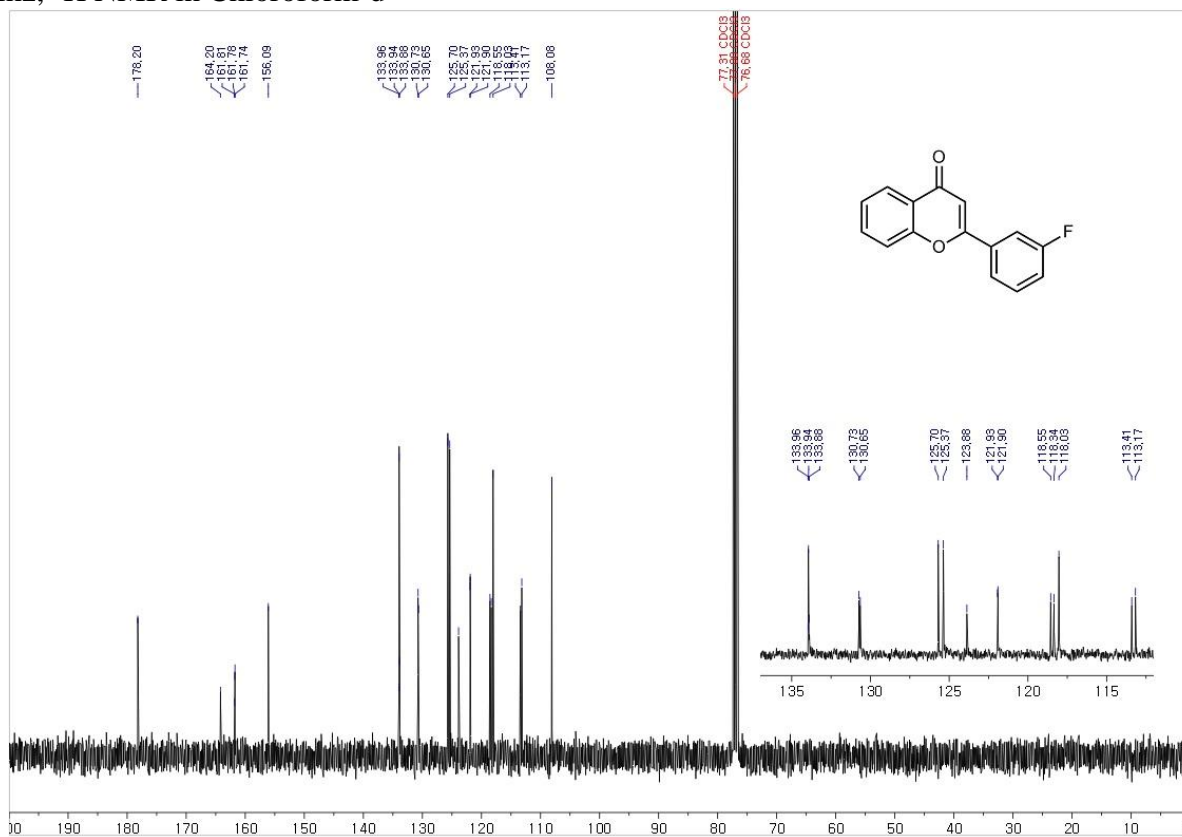

100 Mhz, <sup>13</sup>C NMR in Chloroform-d

## 2-(2-methoxyphenyl)-4H-chromen-4-one (4v)

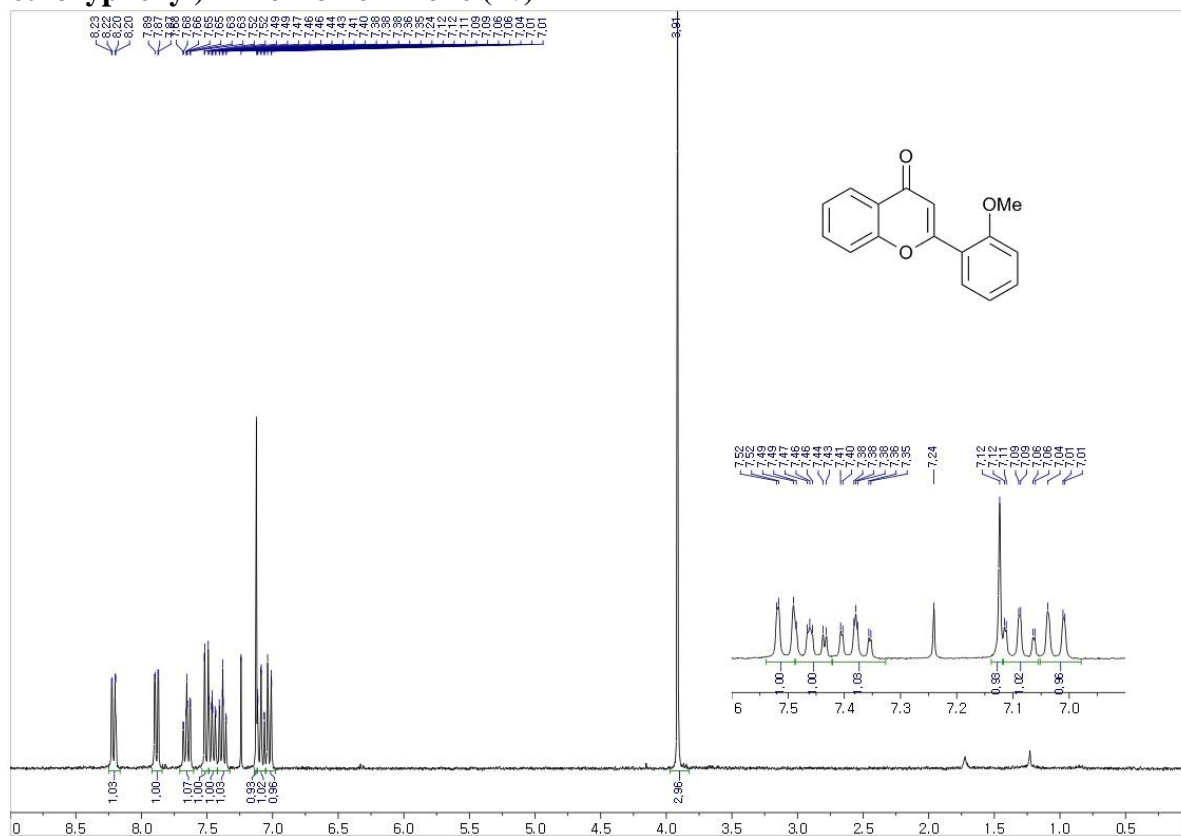

400 Mhz, <sup>1</sup>H NMR in Chloroform-d

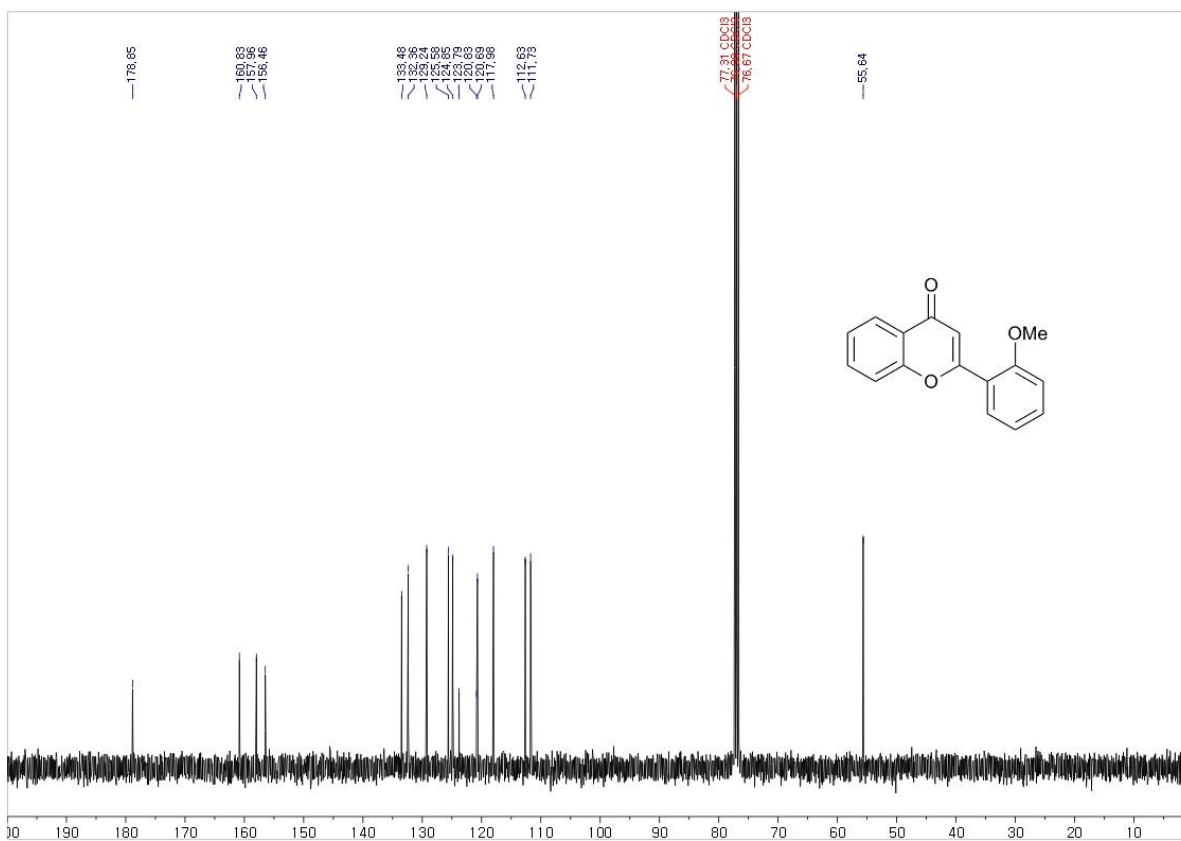

100 Mhz, <sup>13</sup>C NMR in Chloroform-d

# **6-bromo-2-phenyl-4H-chromen-4-one (5a)**

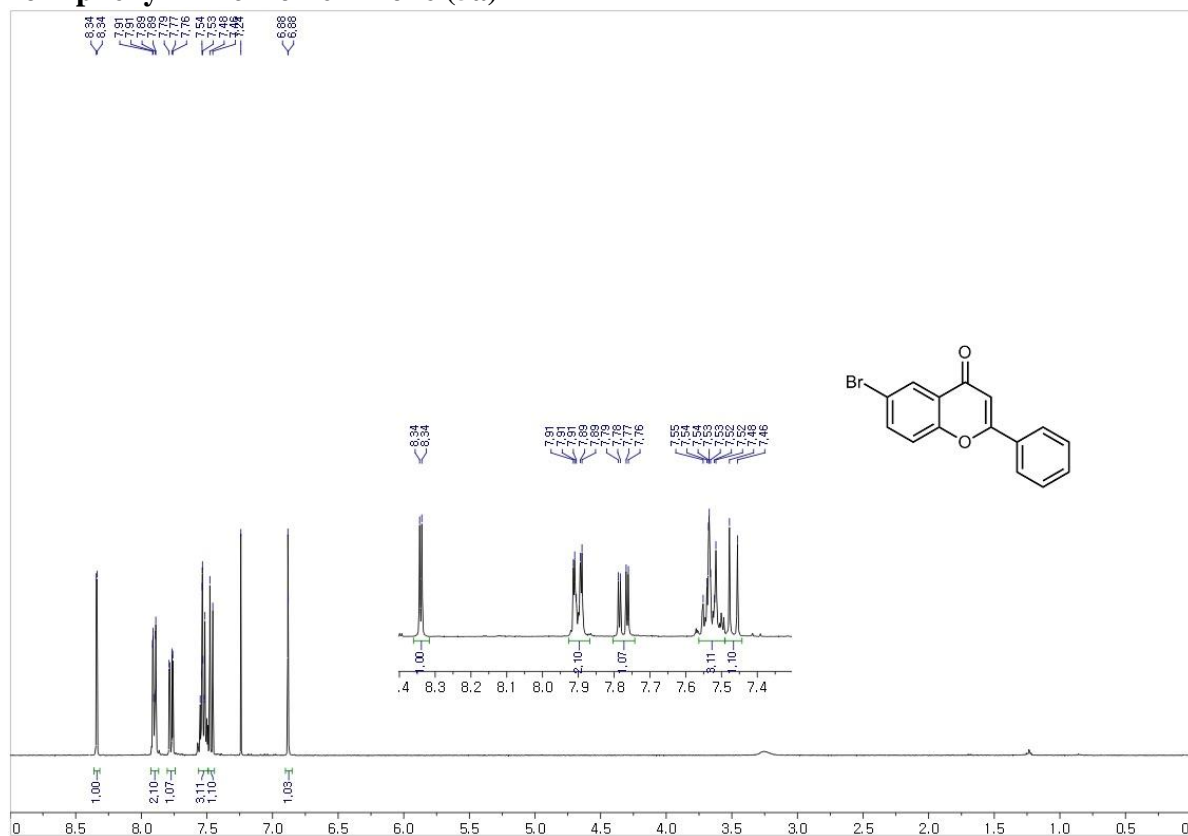

400 Mhz, <sup>1</sup>H NMR in Chloroform-d

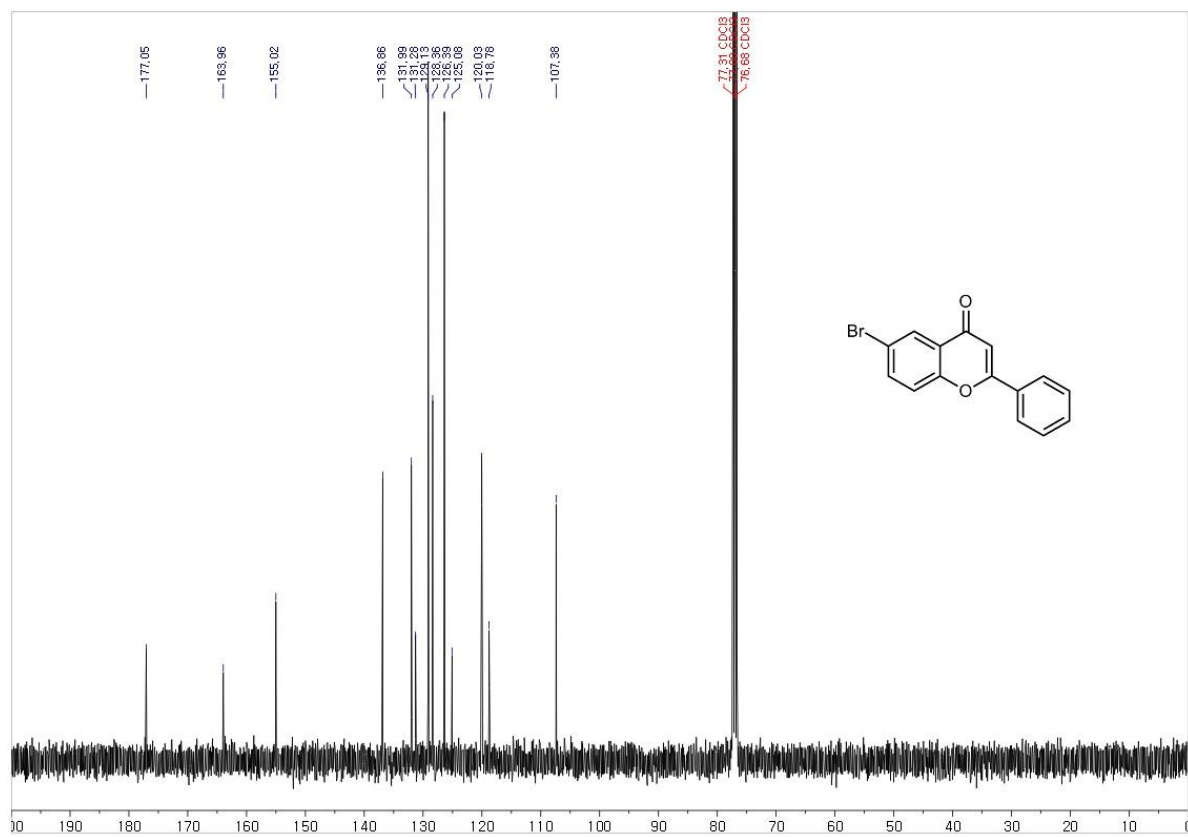

100 Mhz, <sup>13</sup>C NMR in Chloroform-d

# 6-bromo-2-phenyl-4H-chromen-4-one (5b)

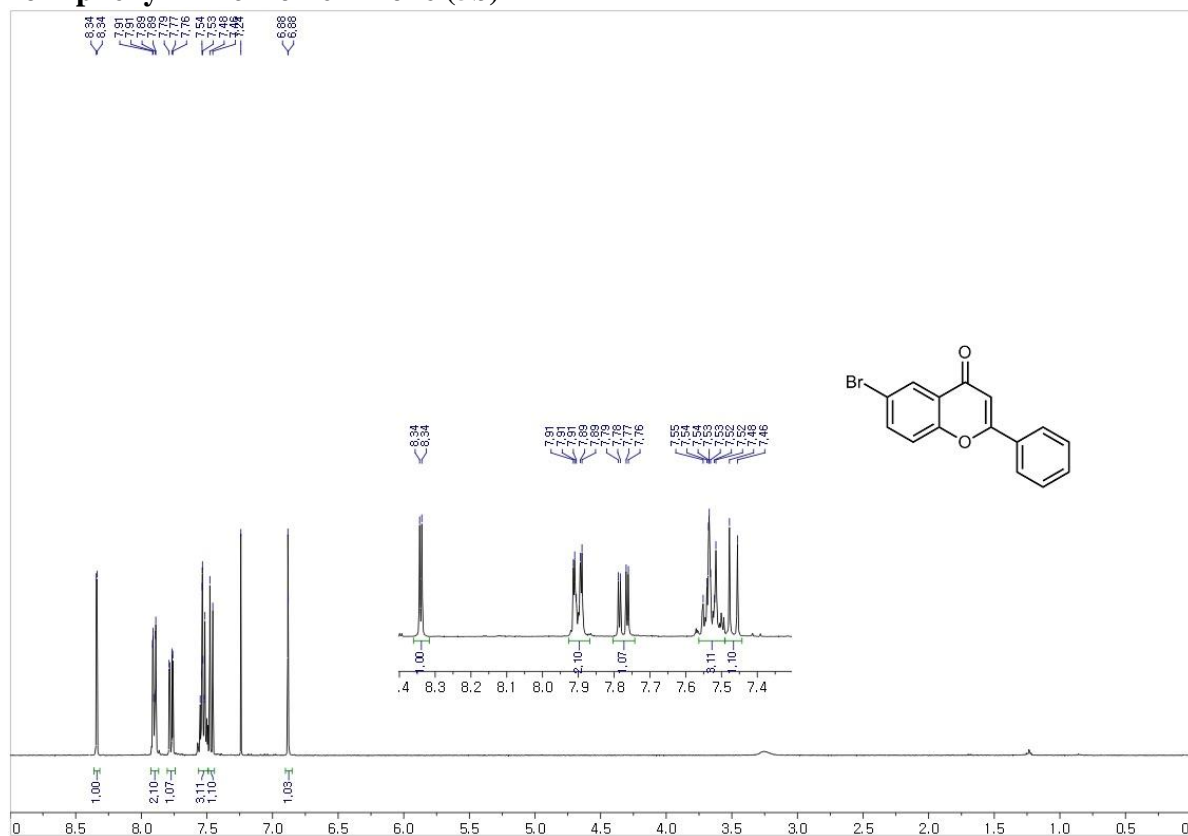

400 Mhz, <sup>1</sup>H NMR in Chloroform-d

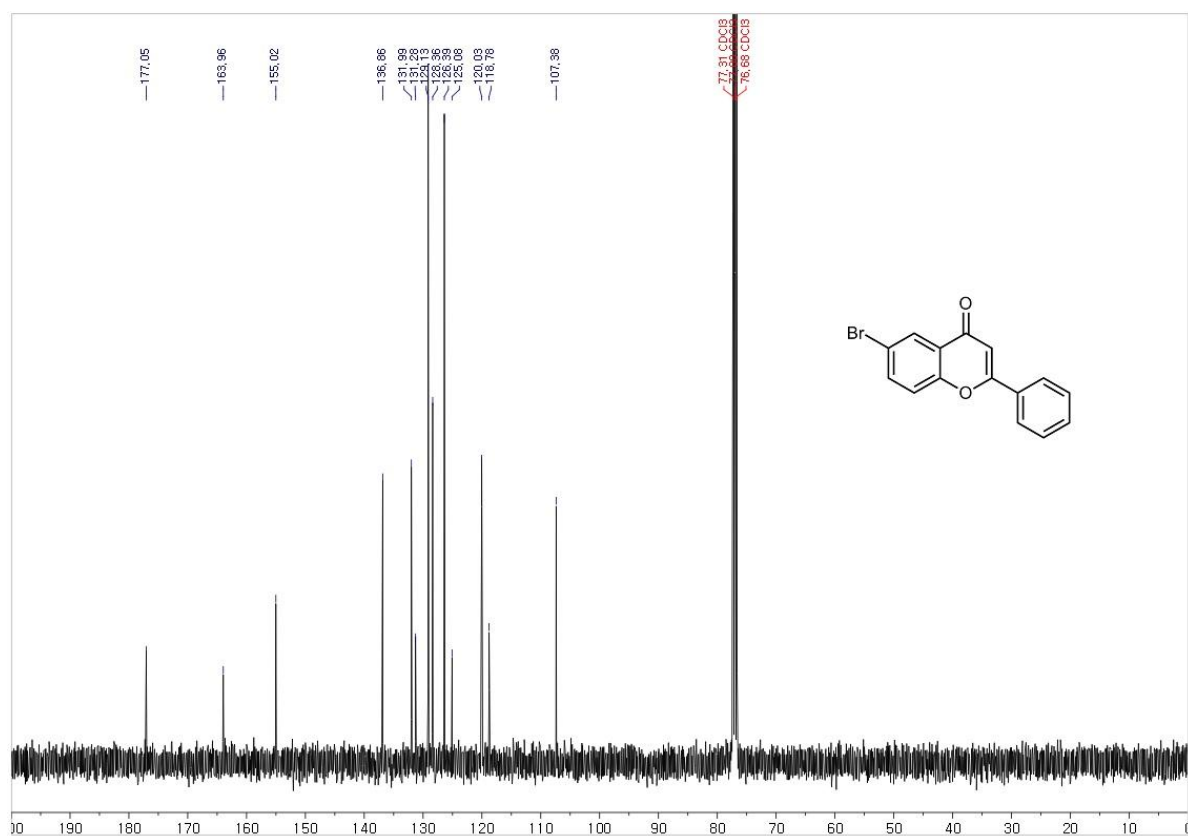

100 Mhz, <sup>13</sup>C NMR in Chloroform-d

# 4-oxo-2-phenyl-4H-chromen-7-yl acetate (5c)

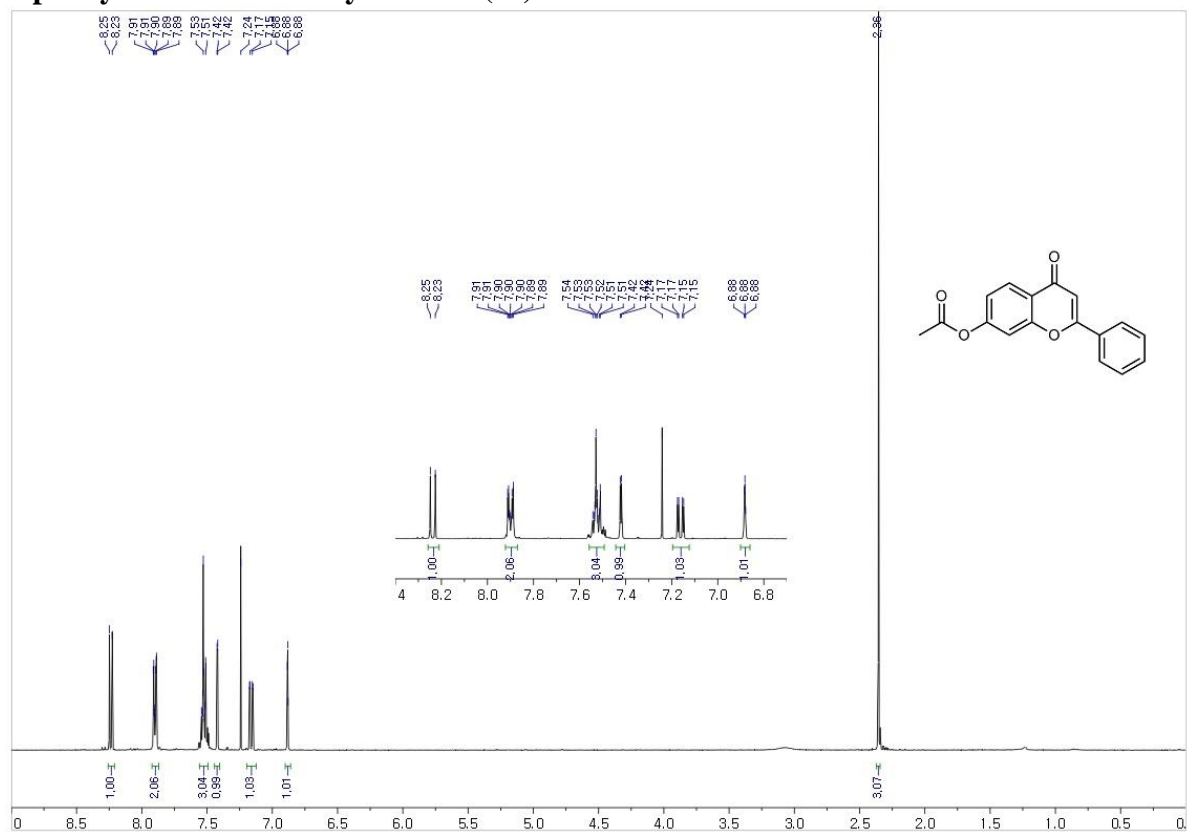

400 Mhz, <sup>1</sup>H NMR in Chloroform-d

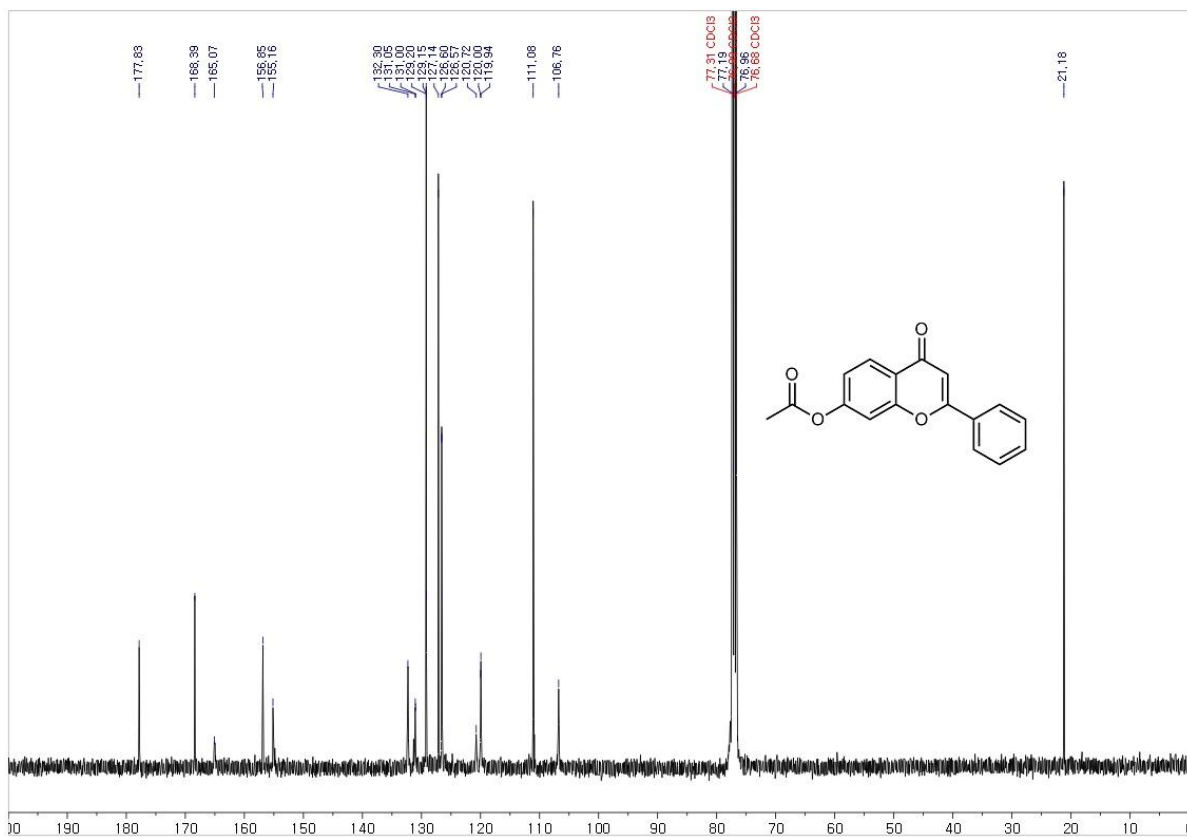

100 Mhz, <sup>13</sup>C NMR in Chloroform-d

# 7-methoxy-2-phenyl-4H-chromen-4-one (5d)

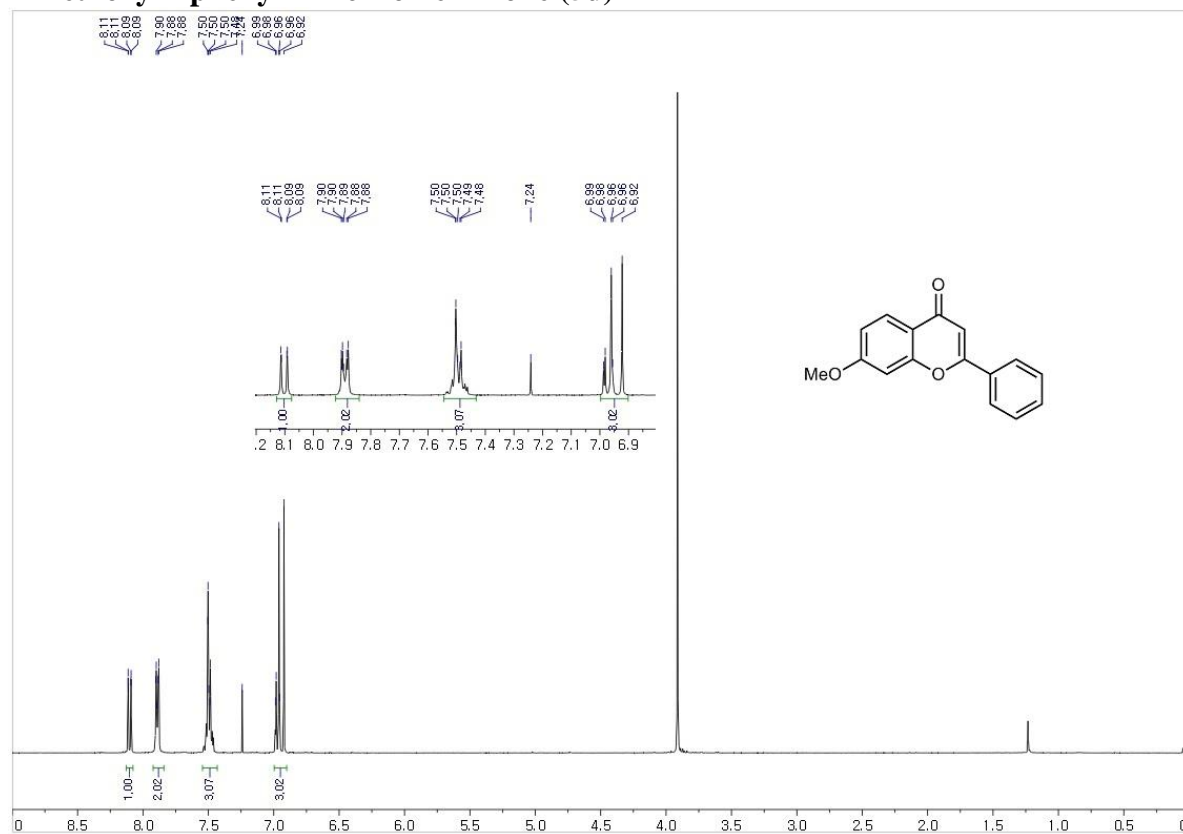

400 Mhz, <sup>1</sup>H NMR in Chloroform-d

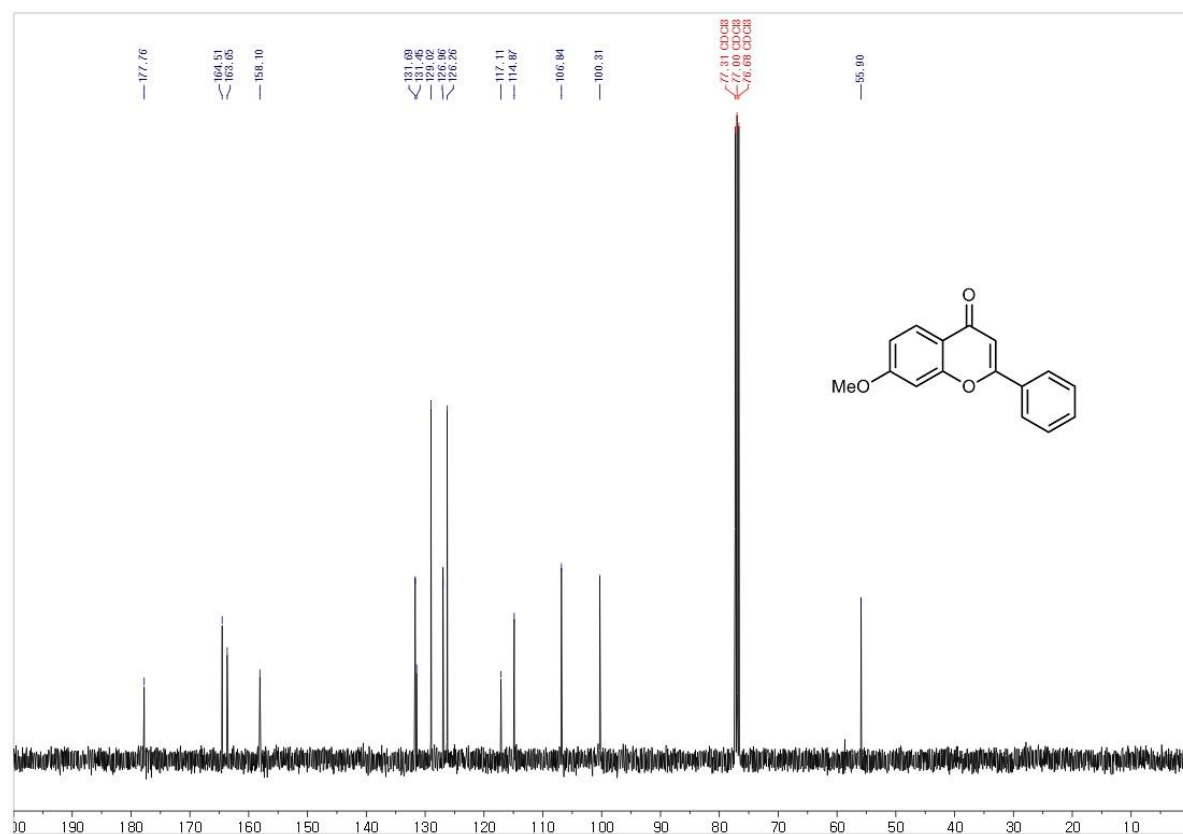

100 Mhz, <sup>13</sup>C NMR in Chloroform-d

# 6-nitro-2-phenyl-4H-chromen-4-one (5e)

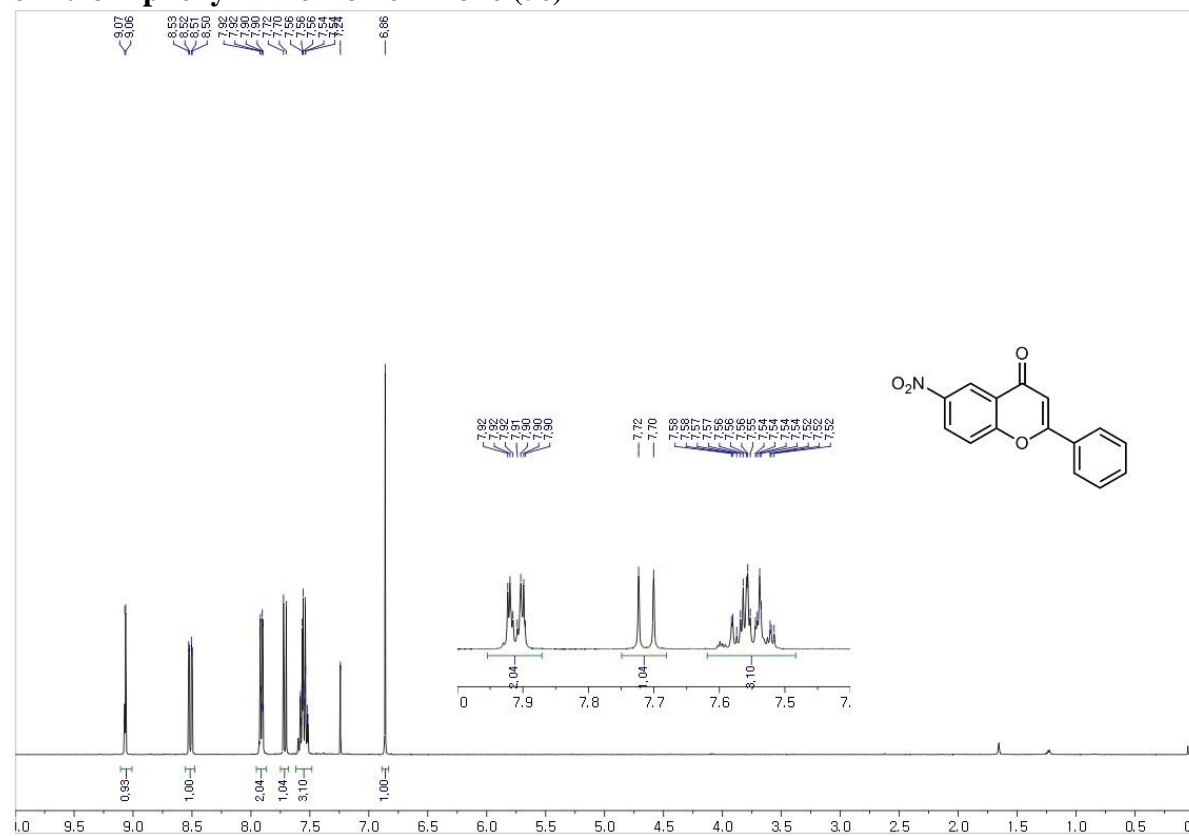

400 Mhz, <sup>1</sup>H NMR in Chloroform-d

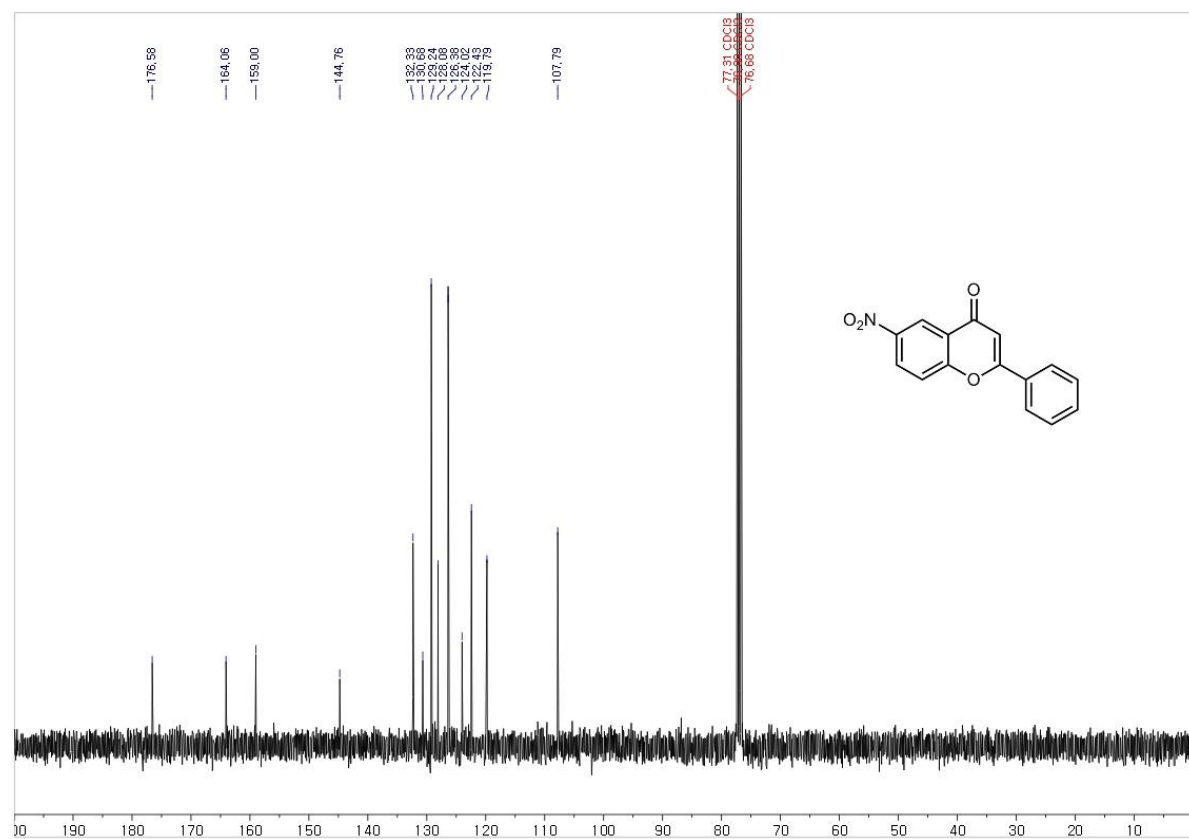

**6-fluoro-2-phenyl-4H-chromen-4-one (5f)**

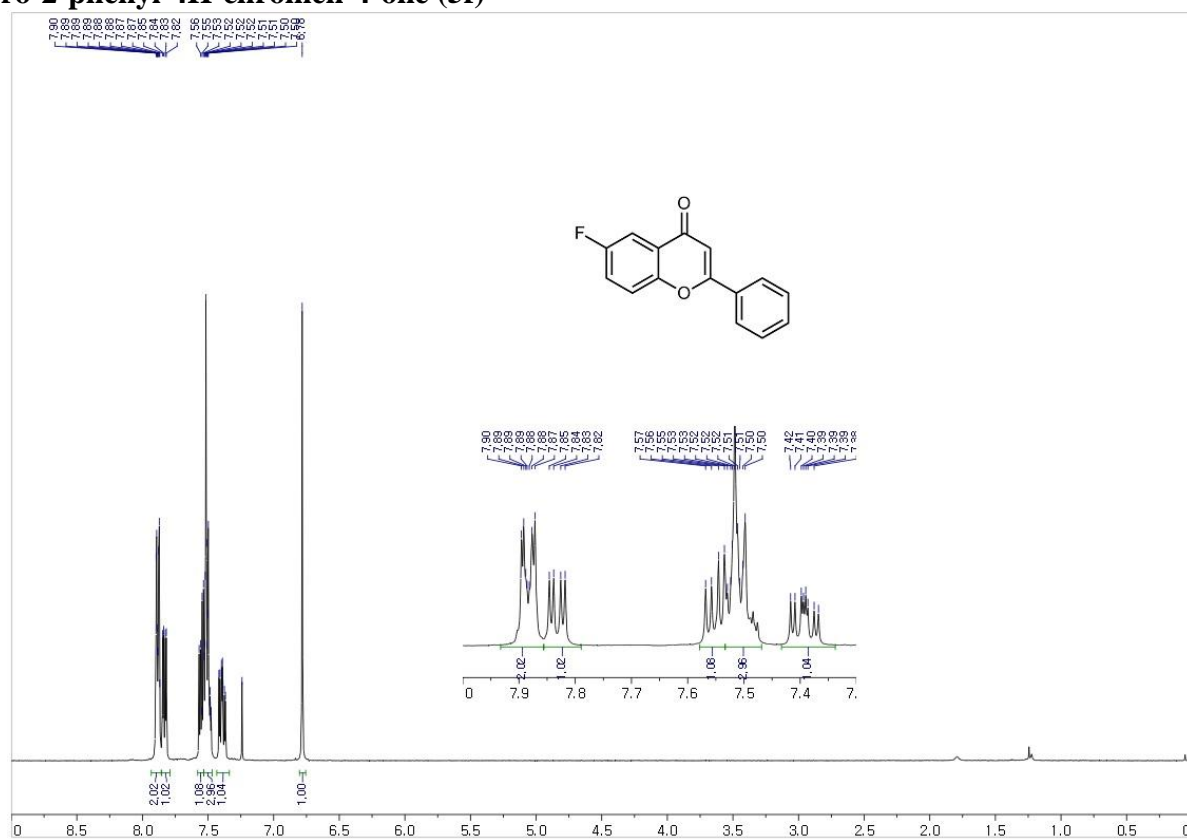

400 Mhz, <sup>1</sup>H NMR in Chloroform-d

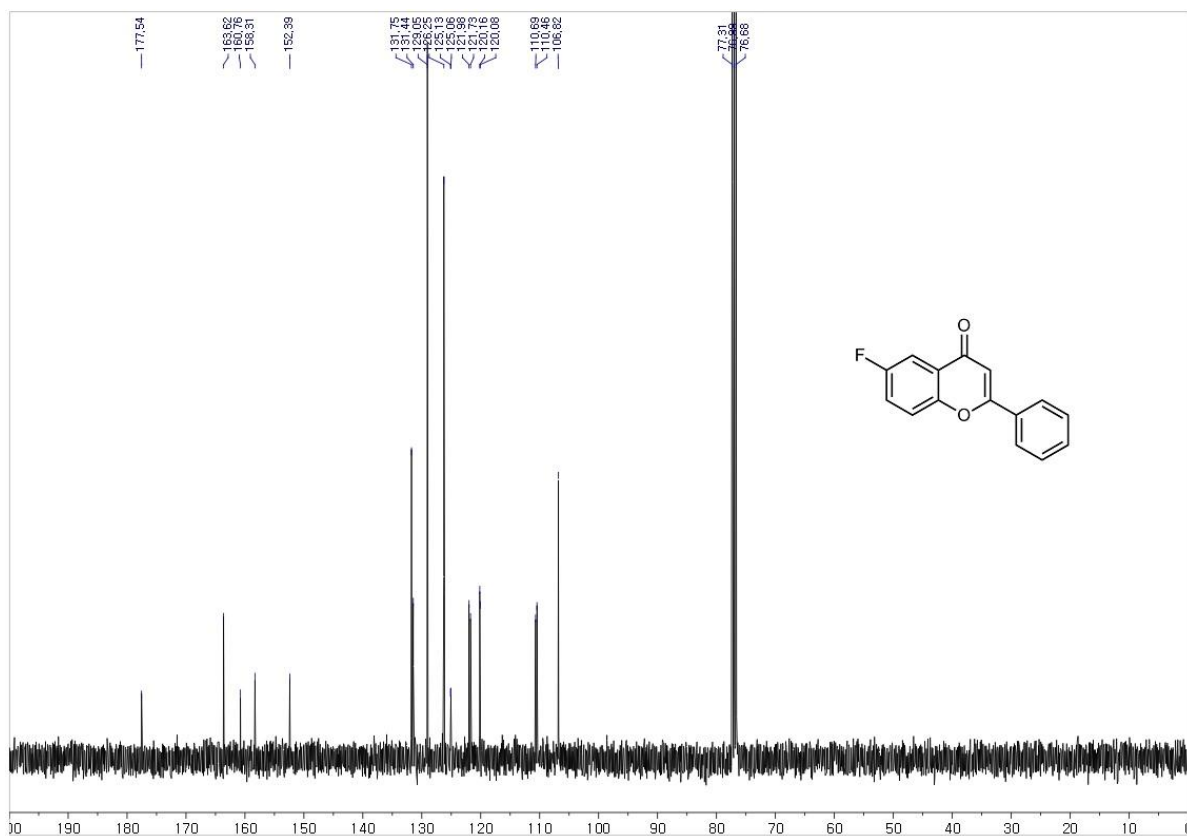

100 Mhz, <sup>13</sup>C NMR in Chloroform-d



**4-oxo-2-phenyl-4H-chromen-7-yl trifluoromethanesulfonate. (5g)**

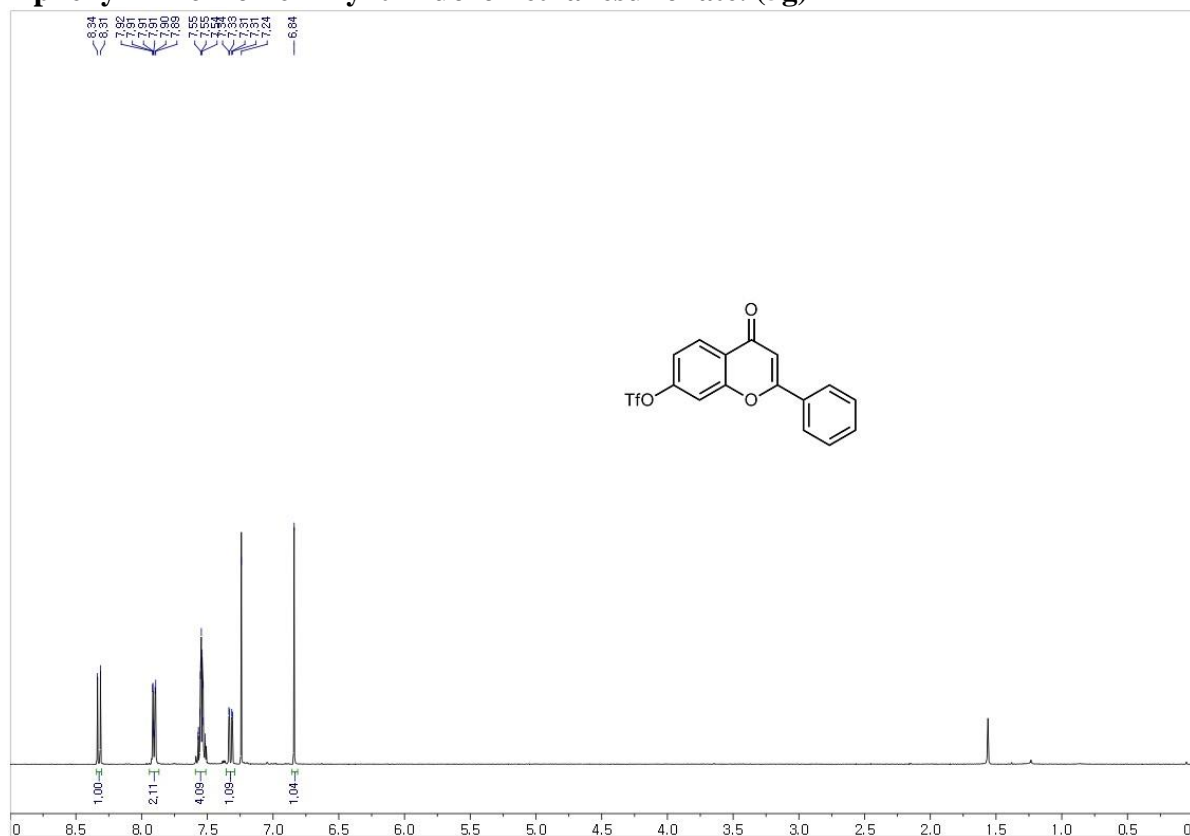

400 Mhz, <sup>1</sup>H NMR in Chloroform-d

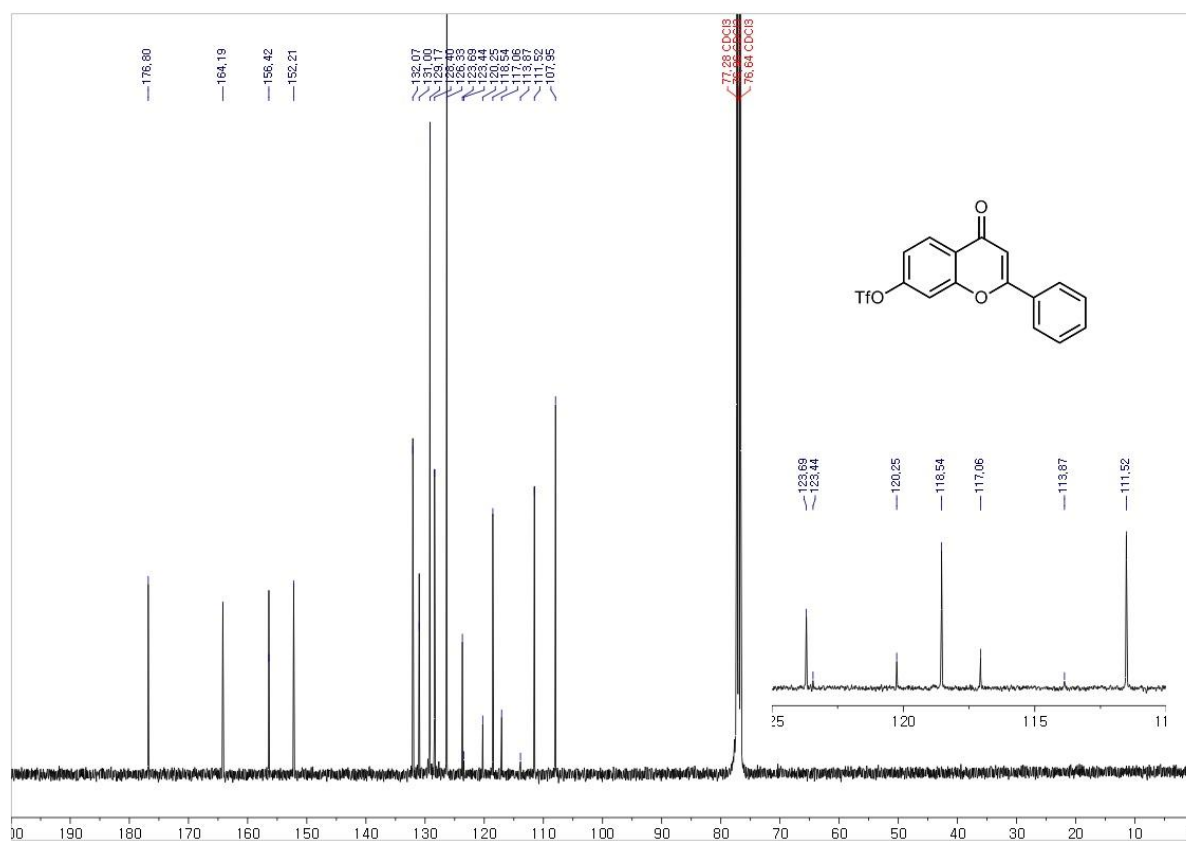

100 Mhz, <sup>13</sup>C NMR in Chloroform-d

**6-chloro-2-phenyl-4H-chromen-7-one (5h)**

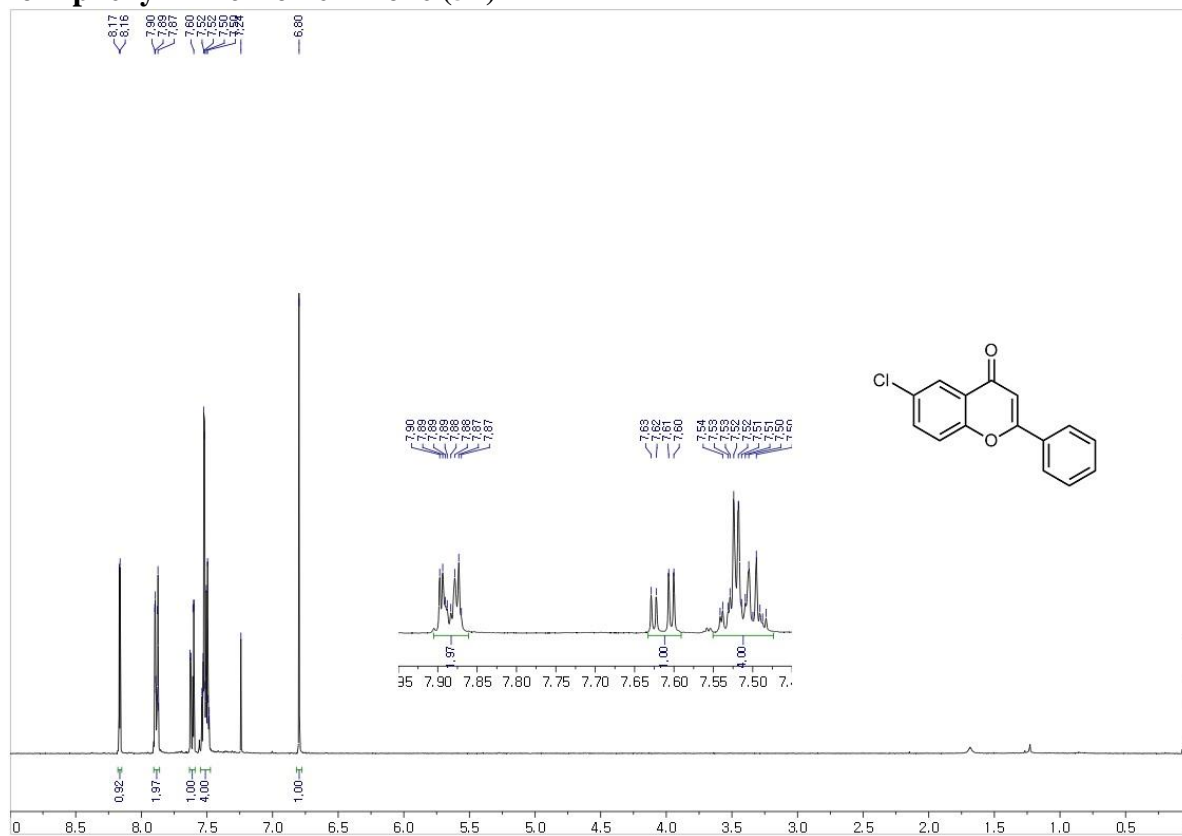

400 Mhz, <sup>1</sup>H NMR in Chloroform-d

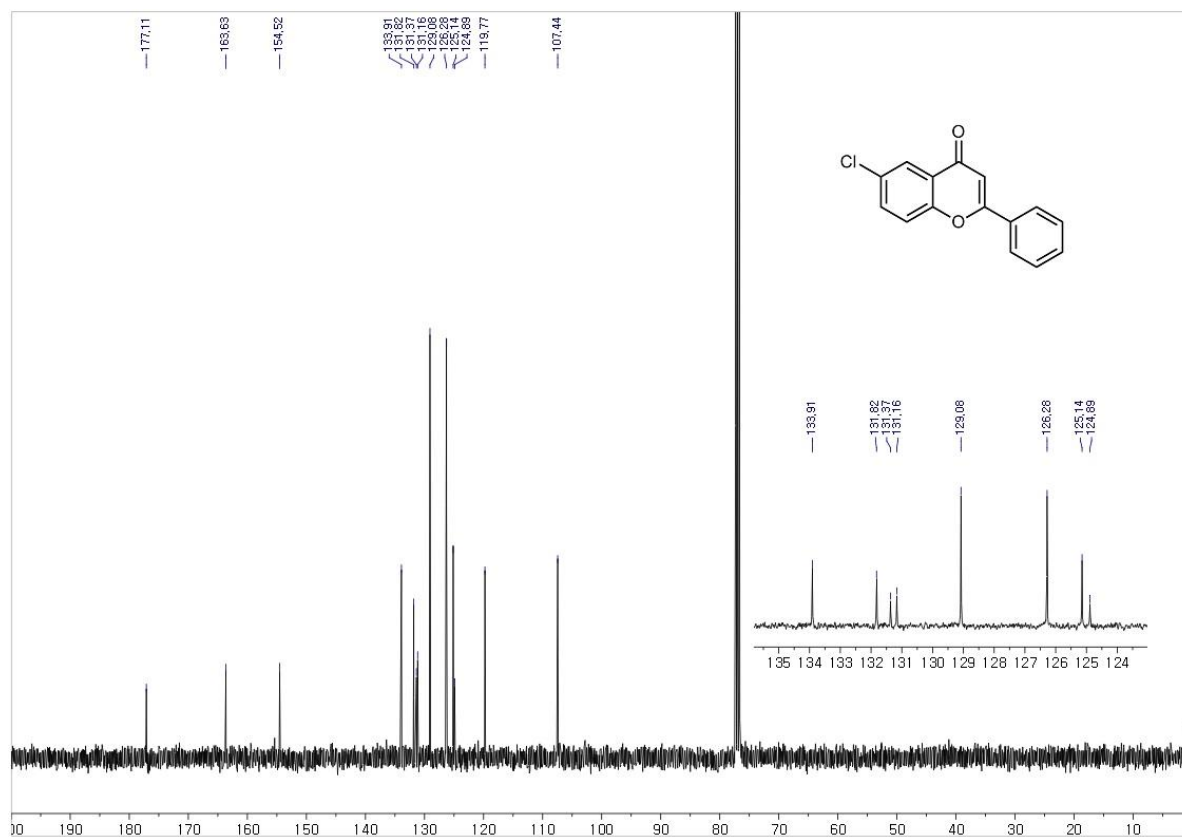

Supplement: c2ob26061a.pdf [file c2ob26061a.pdf]
